# Supplementary material for: A TALE of Transposition: Tn3-Like Transposons Play a Major Role in the Spread of Pathogenicity Determinants of Xanthomonas citri and Other Xanthomonads
Source: PubMed Central journal article supplement — mBio. 2015 Feb 17;6(1):e02505-14. doi: 10.1128/mBio.02505-14 (PMC4337579; doi:10.1128/mbio.02505-14), 2015-02-17
Supplement: mbo001152165st1.pdf [file mbo001152165st1.pdf]

**Table S1. Genomic positions of the TnXax1 IRs**

| <b>Genome or Plasmid identified</b>                                        | <b>IR start</b> | <b>IR stop</b> | <b>Conserved nucleotides</b> |
|----------------------------------------------------------------------------|-----------------|----------------|------------------------------|
| <i>Xanthomonas axonopodis</i> Xac29-1 pXAC64 (64,118 bp)                   | 3989            | 4080           | 92/92                        |
|                                                                            | 12932           | 12842          | 74/92                        |
|                                                                            | 13749           | 13839          | 78/91                        |
|                                                                            | 17700           | 17609          | 75/94                        |
|                                                                            | 25197           | 25108          | 80/90                        |
|                                                                            | 52639           | 52729          | 74/92                        |
|                                                                            | 53945           | 54035          | 78/91                        |
|                                                                            | 58406           | 58315          | 75/94                        |
| <i>Xanthomonas axonopodis</i> Xac29-1 (5,153,455 bp)                       | 3802552         | 3802643        | 92/92                        |
|                                                                            | 3811473         | 3811382        | 72/94                        |
|                                                                            | 3814001         | 3813911        | 70/91                        |
|                                                                            | 4151804         | 4151713        | 76/92                        |
| <i>Xanthomonas axonopodis</i> pv. <i>citrumelo</i> F1 (4,967,469 bp)       | 2452240         | 2452149        | 92/92                        |
|                                                                            | 2558748         | 2558839        | 92/92                        |
|                                                                            | 2438697         | 2438771        | 66/76                        |
| <i>Xanthomonas campestris</i> pv. <i>vesicatoria</i> 85-10 (5,178,466 bp)  | 662686          | 662630         | 51/58                        |
|                                                                            | 2480425         | 2480345        | 66/85                        |
|                                                                            | 2603770         | 2603802        | 30/33                        |
|                                                                            | 2610728         | 2610693        | 32/36                        |
|                                                                            | 2614800         | 2614710        | 75/92                        |
|                                                                            | 2764198         | 2764272        | 66/76                        |
|                                                                            | 2776534         | 2776443        | 92/92                        |
|                                                                            | 4369321         | 4369401        | 67/83                        |
| <i>Xanthomonas axonopodis</i> pv. <i>citri</i> str. 306 pXAC64 (64,920 bp) | 3350            | 3441           | 92/92                        |
|                                                                            | 12294           | 12204          | 74/92                        |
|                                                                            | 14311           | 14401          | 78/91                        |
|                                                                            | 17959           | 17868          | 75/94                        |

|                                                                               |         |         |       |
|-------------------------------------------------------------------------------|---------|---------|-------|
|                                                                               | 25458   | 25369   | 80/90 |
|                                                                               | 53668   | 53758   | 74/92 |
|                                                                               | 54974   | 55064   | 78/91 |
|                                                                               | 58823   | 58732   | 75/94 |
| <hr/>                                                                         |         |         |       |
| <i>Acidovorax citrulli</i> AAC00-1 (5,352,772 bp)                             | 2975223 | 2975303 | 66/85 |
|                                                                               | 2978700 | 2978785 | 69/86 |
|                                                                               | 2978963 | 2978872 | 90/92 |
|                                                                               | 3224781 | 3224872 | 90/92 |
|                                                                               | 3225044 | 3224959 | 69/86 |
|                                                                               | 3228521 | 3228441 | 66/85 |
| <hr/>                                                                         |         |         |       |
| <i>Xanthomonas fuscans</i> subsp. <i>fuscans</i> str. 4834-R, pla (45,224 bp) | 93      | 1       | 75/94 |
|                                                                               | 8706    | 8797    | 77/92 |
|                                                                               | 8796    | 8771    | 24/26 |
|                                                                               | 14156   | 14247   | 76/92 |
|                                                                               | 14246   | 14221   | 24/26 |
|                                                                               | 17444   | 17353   | 76/92 |
|                                                                               | 17354   | 17379   | 24/26 |
|                                                                               | 40015   | 40105   | 83/91 |
| <hr/>                                                                         |         |         |       |
| <i>Xanthomonas citri</i> pv. <i>aurantifolii</i> strain C340 PthC (4,876bp)   | 455     | 545     | 82/91 |
|                                                                               | 4325    | 4278    | 44/49 |
|                                                                               | 4519    | 4453    | 58/68 |
| <hr/>                                                                         |         |         |       |
| <i>Xanthomonas citri</i> plasmid pXcB (37,106 bp)                             | 31463   | 31553   | 82/91 |
|                                                                               | 35333   | 35286   | 44/49 |
|                                                                               | 35527   | 35461   | 58/68 |
| <hr/>                                                                         |         |         |       |
| <i>Xanthomonas fuscans</i> subsp. <i>fuscans</i> str. 4834-R, plc (41,950 bp) | 19199   | 19108   | 75/92 |
|                                                                               | 21844   | 21934   | 75/91 |
|                                                                               | 22338   | 22247   | 73/92 |

|       |       |       |
|-------|-------|-------|
| 26372 | 26462 | 75/91 |
| 30746 | 30837 | 73/92 |
| 31908 | 31820 | 76/90 |
| 38186 | 38276 | 81/91 |
| 41950 | 41904 | 42/47 |

---

*Xanthomonas axonopodis* pv. *manihotis* strain CFBP1851 pthBXam (10,736 bp) 3263 3353 81/91

---

*Xanthomonas axonopodis* Xac29-1 pXAC33 (31,801 bp) 9094 9004 78/91  
17429 17518 80/90  
24927 25018 75/94  
28584 28494 78/91

---

*Xanthomonas axonopodis* pv. *citri* str. 306 pXAC33 (33,700 bp) 5469 5558 80/90  
12968 13059 75/94  
16706 16616 78/91  
30836 30746 78/91

---

*Xanthomonas citri* subsp. *citri* Aw12879 pXcaw58 (58,317 bp) 12492 12582 78/91  
22394 22485 74/94  
26247 26156 78/92  
27553 27463 74/92

---

*Xanthomonas citri* pv. *citri* strain X0053 PthAW (4,559 bp) 460 550 78/91  
4312 4221 74/94

---

*Xanthomonas smithii* subsp. *citri* pB3.7 (4,500 bp) 133 223 78/91  
4378 4287 75/94

---

*Xanthomonas smithii* subsp. *citri* pthA-KC21 (4,070 bp) 109 199 78/91  
3959 3867 75/95

---

*Xanthomonas smithii* subsp. *citri* pB3.1 (3,985 bp) 119 209 78/91

|                                                                                       |         |         |       |
|---------------------------------------------------------------------------------------|---------|---------|-------|
|                                                                                       | 3767    | 3676    | 75/94 |
| <i>Xanthomonas citri</i> hssB3.0 gene for avirulence protein (3,718 bp)               | 101     | 191     | 78/91 |
| <i>Xanthomonas axonopodis</i> pv. <i>glycines</i> strain AG1 plasmid pAG1 (15,143 bp) | 3912    | 3821    | 75/94 |
|                                                                                       | 4663    | 4573    | 74/92 |
|                                                                                       | 14711   | 14802   | 78/92 |
|                                                                                       | 14897   | 14987   | 78/91 |
| <i>Xanthomonas citri</i> strain 3213 PthA (4,275 bp)                                  | 349     | 439     | 78/91 |
|                                                                                       | 4198    | 4107    | 75/94 |
| <i>Xanthomonas campestris</i> pv. <i>armoraciae</i> Hax (3,507 bp)                    | 1       | 91      | 78/91 |
| <i>Xanthomonas campestris</i> pv. <i>armoraciae</i> Hax3 (3,218 bp)                   | 1       | 91      | 78/91 |
|                                                                                       | 3218    | 3150    | 56/71 |
| <i>Xanthomonas citri</i> apl3 (4,639 bp)                                              | 101     | 191     | 78/91 |
|                                                                                       | 4562    | 4471    | 75/94 |
| <i>Xanthomonas citri</i> apl2 (3,823 bp)                                              | 101     | 191     | 78/91 |
| <i>Xanthomonas citri</i> apl1 (4,027 bp)                                              | 101     | 191     | 78/91 |
|                                                                                       | 3950    | 3859    | 75/94 |
| <i>Xanthomonas vesicatoria</i> avrBs4 (4,000 bp)                                      | 72      | 162     | 78/91 |
|                                                                                       | 3912    | 3821    | 75/94 |
| <i>Xanthomonas vesicatoria</i> plasmid pXV11 avrBs3 (4,366 bp)                        | 374     | 464     | 78/91 |
|                                                                                       | 4226    | 4135    | 75/94 |
| <i>Xanthomonas campestris</i> pv. <i>campestris</i> str. ATCC 33913                   | 1902124 | 1902190 | 57/68 |

|                                                                              |         |         |       |
|------------------------------------------------------------------------------|---------|---------|-------|
| (5,076,188 bp)                                                               | 2466511 | 2466591 | 67/82 |
|                                                                              | 2482712 | 2482622 | 72/91 |
|                                                                              | 2482622 | 2482650 | 26/29 |
|                                                                              | 2491914 | 2492005 | 76/92 |
|                                                                              | 2492195 | 2492272 | 60/84 |
|                                                                              | 3434576 | 3434666 | 74/91 |
|                                                                              | 4438478 | 4438566 | 75/91 |
| <hr/>                                                                        |         |         |       |
| <i>Xanthomonas campestris</i> pv. <i>campestris</i> str. B100 (5,079,002 bp) | 1453050 | 1452960 | 74/91 |
|                                                                              | 2409940 | 2409863 | 60/84 |
|                                                                              | 2410221 | 2410130 | 76/92 |
|                                                                              | 2791168 | 2791078 | 73/91 |
|                                                                              | 2791078 | 2791106 | 26/29 |
| <hr/>                                                                        |         |         |       |
| <i>Xanthomonas campestris</i> pv. <i>campestris</i> str. 8004 (5,148,708 bp) | 1476237 | 1476147 | 74/91 |
|                                                                              | 2419112 | 2419035 | 60/84 |
|                                                                              | 2419393 | 2419302 | 76/92 |
|                                                                              | 2496533 | 2496623 | 72/91 |
|                                                                              | 2496623 | 2496595 | 26/29 |
|                                                                              | 2512734 | 2512654 | 67/82 |
|                                                                              | 3137704 | 3137638 | 57/68 |
|                                                                              | 4496061 | 4496149 | 75/91 |
| <hr/>                                                                        |         |         |       |
| <i>Xanthomonas fuscans</i> subsp. <i>fuscans</i> str. 4834-R (4,981,995 bp)  | 1884500 | 1884596 | 74/97 |
|                                                                              | 1886283 | 1886240 | 40/45 |
|                                                                              | 2750592 | 2750676 | 69/85 |
|                                                                              | 2751922 | 2751831 | 74/92 |
|                                                                              | 4939801 | 4939891 | 76/92 |
|                                                                              | 4946417 | 4946327 | 75/91 |
|                                                                              | 4946455 | 4946423 | 31/35 |

|                                                                                               |         |         |       |
|-----------------------------------------------------------------------------------------------|---------|---------|-------|
|                                                                                               | 4953056 | 4953122 | 59/68 |
| <i>Xanthomonas citri</i> subsp. <i>citri</i> Aw12879 (5,321,499 bp)                           | 1262821 | 1262911 | 71/91 |
|                                                                                               | 3952635 | 3952544 | 72/94 |
|                                                                                               | 4729175 | 4729084 | 76/92 |
| <i>Xanthomonas axonopodis</i> pv. <i>citri</i> str. 306 (5,175,554 bp)                        | 3807325 | 3807235 | 70/91 |
|                                                                                               | 4143510 | 4143419 | 76/92 |
| <i>Xanthomonas campestris</i> PthN (3,994 bp)                                                 | 38      | 128     | 76/92 |
|                                                                                               | 135     | 225     | 76/92 |
|                                                                                               | 3579    | 3488    | 75/92 |
|                                                                                               | 3489    | 3517    | 26/29 |
| <i>Xanthomonas oryzae</i> pv. <i>oryzae</i> strain PXO99 type III effector AvrXa23 (6,452 bp) | 100     | 9       | 72/92 |
|                                                                                               | 754     | 844     | 72/91 |
|                                                                                               | 5541    | 5450    | 73/92 |
|                                                                                               | 6195    | 6285    | 74/91 |
| <i>Xanthomonas oryzae</i> pv. <i>oryzae</i> PXO99 (5,240,075 bp)                              | 321285  | 321375  | 73/92 |
|                                                                                               | 324403  | 324314  | 72/91 |
|                                                                                               | 559020  | 559111  | 73/92 |
|                                                                                               | 842065  | 842003  | 51/63 |
|                                                                                               | 1625939 | 1625971 | 31/33 |
|                                                                                               | 1633509 | 1633420 | 65/91 |
|                                                                                               | 1645151 | 1645242 | 72/92 |
|                                                                                               | 1649608 | 1649518 | 73/91 |
|                                                                                               | 1650262 | 1650353 | 72/92 |
|                                                                                               | 1781506 | 1781425 | 65/82 |
|                                                                                               | 1838885 | 1838816 | 57/71 |
|                                                                                               | 2359265 | 2359175 | 73/91 |
|                                                                                               | 2359919 | 2360010 | 73/92 |
|                                                                                               | 2363552 | 2363461 | 73/92 |

|         |         |       |
|---------|---------|-------|
| 2387282 | 2387191 | 73/92 |
| 2387936 | 2388026 | 72/91 |
| 2392130 | 2392039 | 72/92 |
| 2527364 | 2527426 | 51/63 |
| 2681275 | 2681206 | 58/72 |
| 2682578 | 2682668 | 74/91 |
| 2686432 | 2686341 | 72/92 |
| 2687086 | 2687176 | 71/91 |
| 2739451 | 2739513 | 51/63 |
| 2893362 | 2893293 | 58/72 |
| 2894665 | 2894755 | 74/91 |
| 2898519 | 2898428 | 72/92 |
| 2899173 | 2899263 | 71/91 |
| 4104892 | 4104801 | 72/92 |
| 4105546 | 4105636 | 72/91 |
| 4110333 | 4110242 | 73/92 |
| 4110987 | 4111077 | 74/91 |
| 4114733 | 4114642 | 72/92 |
| 4115387 | 4115477 | 72/91 |
| 4118731 | 4118640 | 73/92 |
| 4119385 | 4119475 | 72/91 |

---

*Xanthomonas oryzae* pv. *oryzae* strain C8 Avr/pthC8b (4,525 bp)

|      |      |       |
|------|------|-------|
| 3617 | 3526 | 72/92 |
| 4271 | 4361 | 74/91 |

---

*Xanthomonas campestris* pv. *malvacearum* Avrb6 (3,856 bp)

|      |      |       |
|------|------|-------|
| 314  | 404  | 76/92 |
| 3763 | 3672 | 75/94 |

---

*Xanthomonas oryzae* pv. *oryzae* MAFF 311018 (4,940,217 bp)

|         |         |       |
|---------|---------|-------|
| 1232038 | 1231948 | 74/91 |
| 1232692 | 1232783 | 73/92 |
| 1236438 | 1236348 | 74/91 |
| 1237092 | 1237183 | 72/92 |
| 1241876 | 1241786 | 72/91 |

|         |         |       |
|---------|---------|-------|
| 1242530 | 1242621 | 72/92 |
| 2204911 | 2204821 | 74/91 |
| 2205565 | 2205656 | 73/92 |
| 2209623 | 2209533 | 74/91 |
| 2210920 | 2210989 | 59/72 |
| 2218495 | 2218433 | 51/63 |
| 2352097 | 2352188 | 72/92 |
| 2356288 | 2356197 | 73/92 |
| 2356941 | 2357032 | 73/92 |
| 2360576 | 2360486 | 73/91 |
| 2386917 | 2386826 | 73/92 |
| 2387571 | 2387661 | 72/91 |
| 3028589 | 3028658 | 57/71 |
| 3085100 | 3085181 | 65/82 |
| 3218732 | 3218641 | 73/92 |
| 3219386 | 3219476 | 74/91 |
| 3223441 | 3223350 | 73/92 |
| 3224095 | 3224185 | 74/91 |
| 3228882 | 3228791 | 73/92 |
| 3229536 | 3229626 | 73/91 |
| 3234212 | 3234121 | 71/92 |
| 3244797 | 3244886 | 65/91 |
| 3252366 | 3252334 | 31/33 |
| 4300513 | 4300575 | 51/63 |
| 4529444 | 4529353 | 73/92 |
| 4763458 | 4763547 | 72/91 |
| 4765690 | 4765600 | 72/92 |

---

*Xanthomonas oryzae* pv. *oryzae* AvrXa27 (22,214 bp)

|       |       |       |
|-------|-------|-------|
| 3347  | 3256  | 72/92 |
| 4001  | 4091  | 72/91 |
| 8788  | 8697  | 73/92 |
| 9442  | 9532  | 74/91 |
| 13188 | 13097 | 72/92 |
| 13842 | 13932 | 72/91 |



|       |       |       |
|-------|-------|-------|
| 17186 | 17095 | 73/92 |
| 17840 | 17930 | 72/91 |

---

|                                                                       |         |         |       |
|-----------------------------------------------------------------------|---------|---------|-------|
| <i>Xanthomonas oryzae</i> pv. <i>oryzae</i> KACC 10331 (4,941,439 bp) | 1265943 | 1265853 | 72/91 |
|                                                                       | 1266597 | 1266688 | 73/92 |
|                                                                       | 2225929 | 2225839 | 74/91 |
|                                                                       | 2226583 | 2226674 | 71/92 |
|                                                                       | 2230641 | 2230551 | 74/91 |
|                                                                       | 2231938 | 2232007 | 59/72 |
|                                                                       | 2239521 | 2239482 | 36/40 |
|                                                                       | 2377246 | 2377337 | 72/92 |
|                                                                       | 2381013 | 2380923 | 73/91 |
|                                                                       | 2401087 | 2400996 | 73/92 |
|                                                                       | 2401741 | 2401831 | 72/91 |
|                                                                       | 2406648 | 2406604 | 40/45 |
|                                                                       | 2407301 | 2407392 | 73/92 |
|                                                                       | 3035786 | 3035855 | 57/71 |
|                                                                       | 3092324 | 3092405 | 65/82 |
|                                                                       | 3223775 | 3223684 | 72/92 |
|                                                                       | 3224429 | 3224519 | 72/91 |
|                                                                       | 3229927 | 3229836 | 72/92 |
|                                                                       | 3230581 | 3230671 | 73/91 |
|                                                                       | 3234546 | 3234455 | 71/92 |
|                                                                       | 3252722 | 3252690 | 31/33 |
|                                                                       | 4307290 | 4307352 | 51/63 |
|                                                                       | 4534573 | 4534482 | 73/92 |
|                                                                       | 4767482 | 4767569 | 72/91 |
|                                                                       | 4770598 | 4770508 | 72/92 |

---

|                                                                                      |        |        |       |
|--------------------------------------------------------------------------------------|--------|--------|-------|
| <i>Xanthomonas campestris</i> pv. <i>vesicatoria</i> plasmid pXCV183<br>(182,572 bp) | 101536 | 101571 | 31/36 |
|                                                                                      | 112968 | 113058 | 73/91 |
|                                                                                      | 113058 | 113030 | 26/29 |

---

|                                                                                           |         |         |       |
|-------------------------------------------------------------------------------------------|---------|---------|-------|
| <i>Xanthomonas arboricola</i> pv. <i>pruni</i> str. CFBP 5530 plasmid pXap41 (41,102 bp)  | 1514    | 1598    | 70/86 |
|                                                                                           | 11847   | 11812   | 31/36 |
|                                                                                           | 15966   | 16031   | 57/69 |
|                                                                                           | 25065   | 24975   | 74/92 |
| <i>Xanthomonas axonopodis</i> pv. <i>glycines</i> strain 8ra plasmid pXAG81 (26,721 bp)   | 3912    | 3821    | 75/94 |
|                                                                                           | 4663    | 4573    | 74/92 |
|                                                                                           | 22797   | 22887   | 74/92 |
| <i>Xanthomonas campestris</i> pv. <i>campestris</i> beta-galactosidase Gal35I (3,423 bp)  | 2801    | 2892    | 74/92 |
| <i>Xanthomonas oryzae</i> pv. <i>oryzicola</i> BLS256 (4,831,739 bp)                      | 653841  | 653779  | 53/63 |
|                                                                                           | 1558706 | 1558796 | 73/92 |
|                                                                                           | 1686668 | 1686616 | 47/53 |
|                                                                                           | 1697100 | 1697009 | 74/93 |
|                                                                                           | 2548617 | 2548706 | 66/91 |
|                                                                                           | 2556024 | 2555991 | 31/34 |
| <i>Xanthomonas oryzae</i> pv. <i>oryzicola</i> Avr/Pth13 (3,170 bp)                       | 2852    | 2761    | 74/93 |
| <i>Xanthomonas campestris</i> pv. <i>vesicatoria</i> outer protein B (23,471 bp)          | 8848    | 8904    | 51/58 |
| <i>Xanthomonas campestris</i> pv. <i>vesicatoria</i> avirulence protein AvrBsT (1,931 bp) | 1395    | 1484    | 71/92 |
| <i>Xanthomonas oryzae</i> avirulence protein AvrXa10 (3,720 bp)                           | 4       | 92      | 70/91 |
| <i>Xanthomonas albilineans</i> GPE PC73 (3,768,695 bp)                                    | 2246665 | 2246755 | 68/91 |
|                                                                                           | 1840960 | 1840907 | 42/54 |
| <i>Xanthomonas campestris</i> pv. <i>vesicatoria</i> outer protein J (1,441               | 61      | 141     | 66/85 |

---

bp)

---

|                                                                   |      |      |       |
|-------------------------------------------------------------------|------|------|-------|
| <i>Xanthomonas albilineans</i> str. GPE PC73, plasmid (24,837 bp) | 7897 | 7932 | 33/36 |
|-------------------------------------------------------------------|------|------|-------|

---

\* conserved nucleotides: x/y where y is the full length of the IR compared to the canonical 92 bp of TnXax1 and x is the number of conserved nucleotides
