# Supplementary material for: A TALE of Transposition: Tn3-Like Transposons Play a Major Role in the Spread of Pathogenicity Determinants of Xanthomonas citri and Other Xanthomonads
Source: PubMed Central journal article supplement — mBio. 2015 Feb 17;6(1):e02505-14. doi: 10.1128/mBio.02505-14 (PMC4337579; doi:10.1128/mbio.02505-14), 2015-02-17
Supplement: mbo001152165st2.pdf [file mbo001152165st2.pdf]

**Table S2. Transposons related to TnXax1****A) TnPa43 :19,903 bp – Source: ISfinder**

| Locus Tag | Element ID   | Coordinates    | Length | Orientation | Predicted Product                                                       |
|-----------|--------------|----------------|--------|-------------|-------------------------------------------------------------------------|
| n/d       | ISPa43_00001 | 43..1,824      | 1,782  | -           | Methyltransferase domain protein                                        |
| n/d       | ISPa43_00002 | 2,224..2,451   | 228    | -           | hypothetical protein                                                    |
| n/d       | ISPa43_00003 | 2,769..3,629   | 861    | +           | ectoine hydroxylase                                                     |
| n/d       | ISPa43_00004 | 3,654..4,550   | 897    | +           | Phosphate-import protein PhnD precursor                                 |
| n/d       | ISPa43_00005 | 4,674..5,522   | 849    | +           | Phosphate-import permease protein PhnE                                  |
| n/d       | ISPa43_00006 | 5,556..6,368   | 813    | +           | Phosphate-import ATP-binding protein PhnC                               |
| n/d       | ISPa43_00007 | 6,380..6,925   | 546    | +           | phosphonate ABC transporter, permease protein PhnE                      |
| n/d       | ISPa43_00008 | 7,011..7,412   | 402    | +           | Phosphate-import permease protein PhnE                                  |
| n/d       | ISPa43_00009 | 7,439..7,918   | 480    | +           | phosphonate C-P lyase system protein PhnG                               |
| n/d       | ISPa43_00010 | 7,911..8,495   | 585    | +           | Alpha-D-ribose 1-methylphosphonate 5-triphosphate synthase subunit PhnH |
| n/d       | ISPa43_00011 | 8,495..9,616   | 1,122  | +           | Alpha-D-ribose 1-methylphosphonate 5-triphosphate synthase subunit PhnI |
| n/d       | ISPa43_00012 | 9,613..10,518  | 906    | +           | Alpha-D-ribose 1-methylphosphonate 5-phosphate C-P lyase                |
| n/d       | ISPa43_00013 | 10,744..11,316 | 573    | +           | Putative phosphonates utilization ATP-binding protein PhnK              |
| n/d       | ISPa43_00014 | 11,330..12,055 | 726    | +           | Alpha-D-ribose 1-methylphosphonate 5-triphosphate synthase subunit PhnL |
| n/d       | ISPa43_00015 | 12,052..13,206 | 1,155  | +           | Alpha-D-ribose 1-methylphosphonate 5-triphosphate diphosphatase         |
| n/d       | ISPa43_00016 | 13,220..13,789 | 570    | +           | Ribose 1,5-bisphosphate phosphokinase PhnN                              |
| n/d       | ISPa43_00017 | 13,780..14,547 | 768    | +           | Phosphoribosyl 1,2-cyclic phosphodiesterase                             |
| n/d       | ISPa43_00018 | 14,544..15,353 | 810    | +           | phosphonate utilization associated putative membrane protein            |
| n/d       | ISPa43_00019 | 15,471..16,805 | 1,335  | +           | site-specific tyrosine recombinase XerD (TnpI)                          |
| n/d       | ISPa43_00020 | 16,862..19,849 | 2,988  | +           | Transposase, TnpA family (DDE domain)                                   |

**B) TnStma1: 28,714 bp from Stenotrophomonas maltophilia D457 - NC\_017671**

| Locus Tag | Element ID      | Coordinates    | Length | Orientation | Predicted Product                                    |
|-----------|-----------------|----------------|--------|-------------|------------------------------------------------------|
| SMD_2129  | ISSStma18_00001 | 84..1,142      | 1,059  | -           | chromosome segregation protein SMC                   |
| SMD_2130  | ISSStma18_00002 | 1,465..1,857   | 393    | +           | hypothetical protein                                 |
| SMD_2131  | ISSStma18_00003 | 1,929..3,233   | 1,305  | +           | type I secretion outer membrane protein, TolC family |
| SMD_2132  | ISSStma18_00004 | 3,230..4,726   | 1,497  | +           | Cation efflux system protein CusB precursor          |
| SMD_2133  | ISSStma18_00005 | 4,723..7,884   | 3,162  | +           | Cation efflux system protein CusA                    |
| SMD_2134  | ISSStma18_00006 | 7,930..8,286   | 357    | +           | hypothetical protein                                 |
| SMD_2135  | ISSStma18_00007 | 8,379..8,780   | 402    | +           | Cation efflux system protein CusF precursor          |
| SMD_2136  | ISSStma18_00008 | 9,152..9,661   | 510    | -           | Lipoprotein signal peptidase                         |
| SMD_2137  | ISSStma18_00009 | 9,654..10,901  | 1,248  | +           | Sodium/calcium exchanger protein                     |
| SMD_2138  | ISSStma18_00010 | 10,924..11,244 | 321    | -           | Nitrogen regulatory protein P-II                     |
| SMD_2139  | ISSStma18_00011 | 11,244..14,369 | 3,126  | -           | Cation efflux system protein CzcA                    |
| SMD_2140  | ISSStma18_00012 | 14,407..15,597 | 1,191  | -           | Nickel and cobalt resistance protein CnrB            |
| SMD_2141  | ISSStma18_00013 | 15,594..16,871 | 1,278  | -           | Cation efflux system protein CzcC                    |
| n/d       | ISSStma18_00014 | 17,170..17,337 | 168    | +           | hypothetical protein                                 |
| SMD_2142  | ISSStma18_00015 | 17,575..19,971 | 2,397  | -           | putative cadmium-transporting ATPase                 |
| SMD_2143  | ISSStma18_00016 | 19,968..21,938 | 1,971  | -           | Ferrous iron uptake protein                          |
| SMD_2144  | ISSStma18_00017 | 22,127..22,567 | 441    | +           | Copper export regulator                              |
| SMD_2145  | ISSStma18_00018 | 22,605..24,251 | 1,647  | +           | Glutamine-dependent NAD(+) synthetase                |
| SMD_2146  | ISSStma18_00019 | 24,226..25,527 | 1,302  | +           | site-specific tyrosine recombinase XerD (TnpI)       |
| SMD_2147  | ISSStma18_00020 | 25,566..28,550 | 2,985  | +           | Transposase, TnpA family (DDE domain)                |

**C) TnXca1: 11,523 bp from X. campestris pv. vesicatoria str. 85-10 plasmid pXCV183 - NC\_007507**

| Locus Tag | Element ID  | Coordinates    | Length | Orientation | Predicted Product                     |
|-----------|-------------|----------------|--------|-------------|---------------------------------------|
| XCVd0093  | ISXca_00001 | 352..1,389     | 1,038  | +           | hypothetical protein                  |
| XCVd0094  | ISXca_00002 | 1,377..2,444   | 1,068  | -           | chromosome segregation protein SMC    |
| XCVd0095  | ISXca_00003 | 2,635..2,838   | 204    | +           | hypothetical protein                  |
| XCVd0096  | ISXca_00004 | 2,890..3,603   | 714    | +           | Site-specific recombinase XerD        |
| XCVd0097  | ISXca_00005 | 3,612..6,575   | 2,964  | +           | Transposase, TnpA family              |
| XCVd0098  | ISXca_00006 | 6,906..8,132   | 1,227  | -           | Plasmid encoded RepA protein          |
| XCVd0099  | ISXca_00007 | 8,412..9,599   | 1,188  | -           | UDP-N-acetylglucosamine kinase        |
| XCVd0100  | ISXca_00008 | 9,606..9,869   | 264    | -           | hypothetical protein                  |
| XCVd0101  | ISXca_00009 | 9,894..10,295  | 402    | -           | tRNA(fMet)-specific endonuclease VapC |
| XCVd0102  | ISXca_00010 | 10,292..10,552 | 261    | -           | Virulence-associated protein          |
| XCVd0103  | ISXca_00011 | 10,742..11,308 | 567    | +           | DNA-invertase hin                     |

D) Tn*Tin1*: 6,123 bp from *Thiomonas intermedia* K12 - CP002021 - Only Transposition related genes

| Locus Tag | Element ID   | Coordinates  | Length | Orientation | Predicted Product                  |
|-----------|--------------|--------------|--------|-------------|------------------------------------|
| Tint_1402 | ISTin1_00001 | 49..2,268    | 2,219  | -           | Transposase, TnpA family           |
| Tint_1403 | ISTin1_00002 | 2,265..3,083 | 818    | -           | recombinase                        |
| Tint_1404 | ISTin1_00003 | 3,076..4,596 | 1,520  | -           | Integrase                          |
| Tint_1405 | ISTin1_00004 | 4,981..6,081 | 1,100  | +           | chromosome segregation protein SMC |
