# Supplementary material for: A TALE of Transposition: Tn3-Like Transposons Play a Major Role in the Spread of Pathogenicity Determinants of Xanthomonas citri and Other Xanthomonads
Source: PubMed Central journal article supplement — mBio. 2015 Feb 17;6(1):e02505-14. doi: 10.1128/mBio.02505-14 (PMC4337579; doi:10.1128/mbio.02505-14), 2015-02-17
Supplement: mbo001152165st3.pdf [file mbo001152165st3.pdf]

## Table S3: TnXax1-related MICs

### 1) *Acidovorax citrulli* str. AAC00-1 - CP000512

| MIC ID                                         | Locus Tag | Coordinates          | Length | Orientation | Predicted Product or Feature          |
|------------------------------------------------|-----------|----------------------|--------|-------------|---------------------------------------|
| <b>MIC A</b><br><b>3,740bp</b><br><i>No DR</i> | -         | 2,975,223..2,975,303 | 84     | +           | IRL                                   |
|                                                | -         | 2,978,700..2,978,785 | 92     | +           | IRL                                   |
|                                                | Aave_2708 | 2,975,434..2,976,555 | 1,121  | +           | type III effector - XopJ2 (IPR005083) |
|                                                | -         | 2,978,963..2,978,872 | 92     | -           | IRR                                   |
| <b>MIC B</b><br><b>3,740bp</b><br><i>No DR</i> | -         | 3,224,781..3,224,872 | 92     | +           | IRL                                   |
|                                                | Aave_2938 | 3,227,189..3,228,310 | 1,121  | -           | type III effector - XopJ2 (IPR005083) |
|                                                | -         | 3,225,044..3,224,959 | 84     | -           | IRR                                   |
|                                                | -         | 3,228,521..3,228,441 | 92     | -           | IRR                                   |

### 2) *Xanthomonas citri* subsp. *citri* str. 306, plasmid pXAC33 – NC\_003922

| MIC ID                                         | Locus Tag | Coordinates    | Length | Orientation | Predicted Product or Feature |
|------------------------------------------------|-----------|----------------|--------|-------------|------------------------------|
| <b>MIC A</b><br><b>3,738bp</b><br>[AGATT]      | -         | 12,968..13,059 | 92     | +           | IRL                          |
|                                                | XACa0022  | 13,079..16,459 | 3,380  | -           | TAL effector – PthA1         |
|                                                | -         | 16,616..16,706 | 91     | -           | IRR                          |
| <b>MIC B</b><br><b>3,527bp</b><br><i>No DR</i> | -         | 27,219..27,279 | 63     | +           | IRL                          |
|                                                | XACa0039  | 27,299..30,589 | 3,290  | -           | TAL effector – PthA2         |
|                                                | -         | 30,836..30,746 | 91     | -           | IRR                          |

### 3) *Xanthomonas citri* subsp. *citri* str. 306, plasmid pXAC64 – NC\_003922

| MIC ID                                            | Locus Tag | Coordinates    | Length | Orientation | Predicted Product or Feature |
|---------------------------------------------------|-----------|----------------|--------|-------------|------------------------------|
| <b>MIC A</b><br><b>3,648bp</b><br><i>No DR</i>    | -         | 14,311..14,401 | 91     | +           | IRL                          |
|                                                   | XACb0015  | 14,558..17,848 | 3,290  | +           | TAL effector – PthA3         |
|                                                   | -         | 17,868..17,959 | 92     | -           | IRR                          |
| <b>MIC B</b><br><b>3,758bp</b><br>[GAG(A/C)(T/G)] | -         | 54,974..55,064 | 92     | +           | IRL                          |
|                                                   | XACb0065  | 55,221..58,712 | 3,491  | +           | TAL effector – PthA4         |
|                                                   | -         | 58,823..58,732 | 92     | -           | IRR                          |

### 4) *Xanthomonas citri* subsp. *citri* str. 29-1, plasmid pXAC33 – NC\_021801

| MIC ID                                         | Locus Tag   | Coordinates    | Length | Orientation | Predicted Product or Feature |
|------------------------------------------------|-------------|----------------|--------|-------------|------------------------------|
| <b>MIC A</b><br><b>3,518bp</b><br><i>No DR</i> | -           | 5,576..5,636   | 63     | +           | IRL                          |
|                                                | XAC29_22784 | 5,656..8,487   | 2,831  | -           | TAL effector – PthA1         |
|                                                | -           | 9,004..9,094   | 91     | -           | IRR                          |
| <b>MIC B</b><br><b>3,657bp</b><br>[AGATT]      | -           | 24,927..25,018 | 94     | +           | IRL                          |
|                                                | XAC29_22904 | 25,038..27,977 | 2,939  | -           | TAL effector – PthA2         |
|                                                | -           | 28,494..28,584 | 91     | -           | IRR                          |

5) *Xanthomonas citri* subsp. *citri* str. 29-1, plasmid pXAC64 – NC\_020797

| MIC ID         | Locus Tag   | Coordinates    | Length | Orientation | Predicted Product or Feature |
|----------------|-------------|----------------|--------|-------------|------------------------------|
| <b>MIC A</b>   | -           | 13,749..13,839 | 91     | +           | IRL                          |
| <b>3,951bp</b> | XAC29_22209 | 14,356..17,589 | 3,233  | +           | TAL effector – PthA3         |
| <i>No DR</i>   | -           | 17,609..17,700 | 92     | -           | IRR                          |
| <b>MIC B</b>   | -           | 53,945..54,035 | 91     | +           | IRL                          |
| <b>4,461bp</b> | XAC29_22454 | 54,552..58,295 | 3,743  | +           | TAL effector – PthA4         |
| <i>No DR</i>   | -           | 58,315..58,406 | 94     | -           | IRR                          |

6) *Xanthomonas citri* subsp. *citri* str. A<sup>W</sup> 12879 , plasmid pXcaw58 – NC\_020817

| MIC ID         | Locus Tag   | Coordinates    | Length | Orientation | Predicted Product or Feature |
|----------------|-------------|----------------|--------|-------------|------------------------------|
| <b>MIC A</b>   | -           | 12,492..12,582 | 91     | +           | IRL                          |
| <b>3,914bp</b> | XCAW_b00018 | 12,739..16,326 | 3,587  | +           | TAL effector - PthAw1        |
| <i>No DR</i>   | -           | 16,346..16,406 | 63     | -           | IRR                          |
| <b>MIC B</b>   | -           | 22,394..22,485 | 94     | +           | IRL                          |
| <b>3,853bp</b> | XCAW_b00026 | 22,505..25,999 | 3,494  | -           | TAL effector – PthAw2        |
| <i>No DR</i>   | -           | 26,156..26,247 | 92     | -           | IRR                          |

7) *Xanthomonas citri* plasmid pXcB – AY228335

| MIC ID         | Locus Tag  | Coordinates    | Length | Orientation | Predicted Product or Feature |
|----------------|------------|----------------|--------|-------------|------------------------------|
| <b>MIC A</b>   | -          | 31,463..31,553 | 91     | +           | IRL                          |
| <b>4,064bp</b> | AAO72098.1 | 31,719..35,225 | 3,506  | -           | TAL effector – PthB          |
| <i>No DR</i>   | -          | 35,461..35,527 | 68     | -           | IRR                          |

8) *Xanthomonas axonopodis* pv. *glycines* str. 8ra plasmid pXAG81 – AY80632

| MIC ID         | Locus Tag | Coordinates    | Length | Orientation | Predicted Product or Feature                                   |
|----------------|-----------|----------------|--------|-------------|----------------------------------------------------------------|
| <b>MIC A</b>   | -         | 22,797..22,887 | 92     | +           | IRL                                                            |
| <b>7,618bp</b> | AAX12235  | 22,448..22,825 | 377    | -           | Uncharacterised protein family (IPR011978)                     |
| <i>No DR</i>   | AAX12236  | 22,854..23,279 | 425    | -           | hypothetical protein                                           |
|                | AAX12237  | 23,278..23,628 | 350    | +           | hypothetical protein                                           |
|                | AAX12238  | 23,897..24,226 | 329    | -           | hypothetical protein                                           |
|                | AAX12239  | 24,223..24,759 | 536    | -           | hypothetical protein                                           |
|                | AAX12240  | 24,756..25,328 | 572    | -           | hypothetical protein                                           |
|                | AAX12241  | 25,416..26,503 | 1,087  | -           | IS <i>Xac2</i> transposase orfA (IS3 ssgr IS407) [complete IS] |
|                | AAX12242  | 26,237..26,503 | 266    | -           | IS <i>Xac2</i> transposase orfB (IS3 ssgr IS407) [complete IS] |
|                | AAX12209  | 1..3,801       | 3,801  | +           | TAL effector – AvrBs3/PthA                                     |
|                | -         | 3821..3912     | 94     | -           | IRR                                                            |

9) *Xanthomonas campestris* pv. *campestris* str. ATCC 33913 – AE008922

| MIC ID          | Locus Tag | Coordinates          | Length | Ori | Predicted Product or Feature                                     |
|-----------------|-----------|----------------------|--------|-----|------------------------------------------------------------------|
| <b>MIC A</b>    | -         | 2,466,511..2,466,591 | 91     | +   | IRL                                                              |
| <b>16,202bp</b> | XCC2094   | 2,467,727..2,469,457 | 1,730  | +   | Tannase/feruloyl esterase (IPR011118)                            |
| <i>No DR</i>    | XCC2095   | 2,469,862..2,476,536 | 6,674  | +   | Protein of unknown function (IPR025103/ IPR021754)               |
|                 | XCC2096   | 2,476,686..2,478,239 | 1,553  | +   | Mobilome protein (IPR026487)                                     |
|                 | XCC2098   | 2,478,371..2,478,751 | 380    | -   | IS <i>Xac2</i> partial transposase (IS3 ssgr IS407) [Partial IS] |
|                 | XCC2097   | 2,478,711..2,479,607 | 896    | +   | Tn <i>Pa43</i> partial transposase (Tn3) [Partial IS]            |
|                 | XCC2099   | 2,480,823..2,481,137 | 314    | +   | Protein-tyrosine phosphatase-like (IPR029021)                    |
|                 | XCC2100   | 2,481,228..2,482,565 | 1,337  | +   | Type III Effector - avrBs1                                       |
|                 | -         | 2,482,712..2,482,622 | 91     | -   | IRR                                                              |

Comment: MIC A is 100% identical to MIC A from *X. campestris* pv. *campestris* str. 8004

10) *Xanthomonas campestris* pv. *campestris* str. 8004 – CP000050

| MIC ID          | Locus Tag | Coordinates          | Length | Ori | Predicted Product or Feature                                     |
|-----------------|-----------|----------------------|--------|-----|------------------------------------------------------------------|
| <b>MIC A</b>    | -         | 2,496,533..2,496,623 | 91     | +   | IRR                                                              |
| <b>16,202bp</b> | XC_2081   | 2,496,680..2,498,017 | 1,337  | -   | Type III Effector - avrBs1                                       |
| <i>No DR</i>    | XC_2082   | 2,498,108..2,498,422 | 314    | -   | Protein-tyrosine phosphatase-like (IPR029021)                    |
|                 | XC_2084   | 2,499,638..2,500,534 | 896    | -   | Tn <i>Pa43</i> partial transposase (Tn3) [Partial IS]            |
|                 | XC_2083   | 2,500,494..2,500,874 | 380    | +   | IS <i>Xac2</i> partial transposase (IS3 ssgr IS407) [Partial IS] |
|                 | XC_2085   | 2,501,006..2,502,559 | 1,553  | -   | Mobilome protein (IPR026487)                                     |
|                 | XC_2086   | 2,502,709..2,509,179 | 6,674  | -   | Protein of unknown function (IPR025103/IPR021754)                |
|                 | XC_2087   | 2,509,788..2,511,518 | 1,730  | -   | Tannase/feruloyl esterase (IPR011118)                            |
|                 | -         | 2,512,734..2,512,654 | 91     | -   | IRL                                                              |

Comment: MIC A is 100% identical to MIC A from *X. campestris* pv. *campestris* str. ATCC 33913

11) *Xanthomonas fuscans* subsp. *fuscans* str. 4834-R, plasmid pla – NC\_022539

| MIC ID         | Locus Tag         | Coordinates    | Length | Ori | Predicted Product or Feature                               |
|----------------|-------------------|----------------|--------|-----|------------------------------------------------------------|
| <b>MIC A</b>   | -                 | 8,706..8,797   | 92     | +   | IRL                                                        |
| <b>8,738bp</b> | XFF4834R_pla00140 | 9,203..10,255  | 1,052  | +   | type III effector XopJ2 (IPR005083)                        |
| <i>No DR</i>   | XFF4834R_pla00150 | 10,323..11,651 | 1,328  | +   | IS <i>XaxI</i> aa1 transposase (IS256 family) [Partial IS] |
|                | XFF4834R_pla00170 | 11,628..11,897 | 269    | -   | toxin-antitoxin module, anti-toxin (IPR010985)             |
|                | XFF4834R_pla00190 | 12,360..12,776 | 416    | +   | toxin-antitoxin module, toxin (IPR022907)                  |
|                | XFF4834R_pla00200 | 12,784..13,344 | 560    | +   | Plasmid pRiA4b – XerD-like (IPR012912)                     |
|                | XFF4834R_pla00220 | 13,605..14,153 | 548    | -   | DNA topoisomerase, type IA (IPR000380)                     |
|                | -                 | 14,156..14,247 | 92     | +   | IRL                                                        |
|                | XFF4834R_pla00230 | 14,308..15,606 | 1,298  | -   | Metalloproteinase (IPR024079/IPR001590)                    |
|                | XFF4834R_pla00240 | 15,727..17,046 | 1,319  | -   | Pectin lyase/virulence factor (IPR011050)                  |
|                | -                 | 17,444..17,353 | 92     | -   | IRR                                                        |
| <b>MIC B</b>   | -                 | 40,014..40,101 | 91     | +   | IRL                                                        |
| <b>5,303bp</b> | XFF4834R_pla00510 | 40,541..45,205 | 4,664  | +   | TAL effector – xfutal1                                     |
| <b>[AGCA]</b>  | -                 | 1..93          | 94     | -   | IRR                                                        |

12) *Xanthomonas fuscans* subsp. *fuscans* str. 4834-R, plasmid plc – NC\_022542

| MIC ID                                         | Locus Tag         | Coordinates    | Length | Ori | Predicted Product or Feature                              |
|------------------------------------------------|-------------------|----------------|--------|-----|-----------------------------------------------------------|
| <b>MITE</b><br><b>454bp</b><br><i>No DR</i>    | -                 | 21,844..21,934 | 91     | +   | MITE                                                      |
|                                                | -                 | 22,338..22,247 | 92     | -   | MITE                                                      |
| <b>MIC A</b><br><b>5,536bp</b><br><i>No DR</i> | -                 | 26,372..26,462 | 92     | +   | IRL                                                       |
|                                                | XFF4834R_plc00330 | 26,546..27,373 | 827    | -   | IS <i>Xcd1</i> transposase (IS3 ssgR IS407) [complete IS] |
|                                                | XFF4834R_plc00340 | 27,367..27,633 | 266    | -   | IS <i>Xcd1</i> transposase (IS3 ssgR IS407) [complete IS] |
|                                                | XFF4834R_plc00350 | 27,958..29,028 | 1,070  | -   | type III effector - XopE3                                 |
|                                                | XFF4834R_plc00360 | 29,113..30,390 | 1,277  | -   | lytic murein transglycosylase – <i>mlt</i> (IPR011757)    |
|                                                | -                 | 30,746..30,837 | 92     | +   | IRL                                                       |
|                                                | XFF4834R_plc00380 | 31,123..31,683 | 560    | +   | Plasmid pRiA4b – XerD-like (IPR012912)                    |
| -                                              | 31,908..31,820    | 91             | -      | IRR |                                                           |
| <b>MIC B</b><br><b>3,764bp</b><br><i>No DR</i> | -                 | 38,186..38,276 | 91     | +   | IRL                                                       |
|                                                | XFF4834R_plc00480 | 38,709..41,843 | 3,134  | +   | TAL effector – <i>xfutal2</i>                             |
|                                                | -                 | 41,904..41,950 | 47     | -   | IRR                                                       |

Comment: The lytic murein transglycosylase – *mlt* (XFF4834R\_plc00360) is 98% identical (protein level) to XccA and pXAC64 XccA homologues.

13) *Xanthomonas fuscans* subsp. *fuscans* str. 4834-R – NC\_022541

| MIC ID                                         | Locus Tag            | Coordinates          | Length | Orientation                 | Predicted Product or Feature       |
|------------------------------------------------|----------------------|----------------------|--------|-----------------------------|------------------------------------|
| <b>MIC A</b><br><b>1,783bp</b><br>[GCGAA<br>]  | -                    | 1,884,500..1,884,596 | 97     | +                           | IRL                                |
|                                                | XFF4834R_chr16310    | 1,885,307..1,886,014 | 707    | +                           | Type III effector – XopJ5          |
|                                                | -                    | 1,886,240..1,886,283 | 45     | -                           | IRR                                |
| <b>MIC B</b><br><b>1,330bp</b><br>[AACTC]      | -                    | 2,750,592..2,750,676 | 85     | +                           | IRL                                |
|                                                | XFF4834R_chr23830    | 2,750,881..2,751,828 | 947    | +                           | Type III effector - XopT           |
|                                                | -                    | 2,751,831..2,751,922 | 92     | -                           | IRR                                |
| <b>MIC C</b><br><b>6,616bp</b><br><i>No DR</i> | -                    | 4,939,801..4,939,891 | 92     | +                           | IRL                                |
|                                                | XFF4834R_chr42580    | 4,940,252..4,940,536 | 284    | -                           | Toxin-antitoxin system (IPR007712) |
|                                                | XFF4834R_chr42590    | 4,940,536..4,940,823 | 287    | -                           | Ribbon-helix-helix (IPR010985)     |
|                                                | XFF4834R_chr42600    | 4,940,955..4,941,353 | 132    | -                           | hypothetical protein               |
|                                                | XFF4834R_chr42610    | 4,941,389..4,944,418 | 3,029  | -                           | transposase TnpA (Tn3) (*)         |
|                                                | XFF4834R_chr42620    | 4,944,415..4,945,008 | 593    | -                           | transposase TnpR (Tn3) (*)         |
|                                                | XFF4834R_chr42630    | 4,945,220..4,945,474 | 254    | +                           | Ribbon-helix-helix (IPR010985)     |
| XFF4834R_chr42640                              | 4,945,471..4,945,755 | 284                  | +      | PIN domain-like (IPR029060) |                                    |
| -                                              | 4,946,327..4,946,417 | 91                   | -      | IRR                         |                                    |

(\*) Related with ISPsy30 which is homologous to a Tn5501-like element present in two IncP-1 beta plasmids (accession no. AJ863570 and EF628291); they have a conserved 3.7 kb 3' fragment and a variable configuration of the 5' end. This copy of ISPsy30 in *Pseudomonas syringae* pv. *savastanoi* NCPPB 3335 has entrapped the Type III secretion system effector gene hopAF1. (Source: ISfinder annotation 2011)

14) *Xanthomonas oryzae* pv. *oryzae* str. PXO99A – NC\_010717

| MIC ID                                          | Locus Tag            | Coordinates          | Length | Ori | Predicted Product or Feature                            |
|-------------------------------------------------|----------------------|----------------------|--------|-----|---------------------------------------------------------|
| <b>MIC A</b><br><b>3,119bp</b><br>[TGATT]       | -                    | 321,285..321,375     | 92     | +   | IRL                                                     |
|                                                 | PXO_03553            | 321,508..324,162     | 2,654  | -   | Putative type III Effector (IPR027417/IPR016195)        |
|                                                 | -                    | 324,403..324,314     | 91     | -   | IRR                                                     |
| <b>MIC B</b><br><b>19,302bp</b><br><i>No DR</i> | -                    | 1,625,939..1,625,971 | 33     | +   | IRL                                                     |
|                                                 | -                    | 1,626,142..1,626,585 | 444    | +   | hypothetical protein                                    |
|                                                 | PXO_00238            | 1,626,594..1,627,379 | 786    | +   | transposase (IS256) [Complete IS]                       |
|                                                 | PXO_00239            | 1,627,869..1,627,342 | 526    | -   | transposase (IS3 ssgR IS407) [Complete IS]              |
|                                                 | PXO_00237            | 1,628,099..1,627,863 | 235    | -   | transposase (IS3 ssgR IS407) [Complete IS]              |
|                                                 | PXO_00236            | 1,631,630..1,628,550 | 3,079  | -   | Type III effector - XopU                                |
|                                                 | PXO_00235            | 1,633,144..1,632,047 | 1,096  | -   | ISXoo14 aa1 transposase (IS5) [Complete IS]             |
|                                                 | -                    | 1,633,420..1,633,448 | 29     | +   | IRL                                                     |
|                                                 | -                    | 1,633,420..1,633,509 | 91     | -   | IRR                                                     |
|                                                 | PXO_00234            | 1,635,617..1,633,530 | 2,086  | -   | Type III effector - XopX                                |
|                                                 | PXO_00233            | 1,636,492..1,637,448 | 957    | +   | IS1112 aa1 transposase (IS30) [Partial IS]              |
|                                                 | -                    | 1,637,451..1,638,299 | 849    | +   | Two component system (IPR011123)                        |
|                                                 | PXO_00232            | 1,638,739..1,638,161 | 577    | -   | DNA binding – Homeodoamin-like (IPR009057)              |
|                                                 | PXO_00231            | 1,638,833..1,639,975 | 1,143  | +   | Membrane fusion protein (IPR006143)                     |
|                                                 | PXO_00230            | 1,640,032..1,642,620 | 2,589  | +   | Acridiflavin resistance protein – disrupted (IPR001036) |
|                                                 | PXO_00229            | 1,642,703..1,644,178 | 1,476  | +   | ISXoo5 aa1 transposase (IS5 ssgR IS5) [Complete IS]     |
|                                                 | PXO_00228            | 1,644,249..1,644,761 | 513    | +   | Acridiflavin resistance protein – disrupted (IPR001036) |
|                                                 | -                    | 1,645,213..1,645,241 | 29     | -   | IRR                                                     |
| <b>MIC C</b><br><b>4,457bp</b><br><i>No DR</i>  | -                    | 1,645,151..1,645,242 | 92     | +   | IRL                                                     |
|                                                 | PXO_00227            | 1,645,240..1,649,043 | 3,801  | -   | TAL effector - PthXo1                                   |
|                                                 | -                    | 1,649,518..1,649,608 | 91     | -   | IRR                                                     |
| <b>MIC D</b><br><b>3,633 bp</b><br>[TA]         | -                    | 2,359,919..2,360,010 | 92     | +   | IRL                                                     |
|                                                 | PXO_00567            | 2,360,008..2,362,440 | 2,430  | -   | TAL effector - talC5a                                   |
|                                                 | PXO_05602            | 2,362,441..2,362,563 | 120    | +   | hypothetical protein                                    |
|                                                 | PXO_05603            | 2,362,535..2,362,690 | 153    | +   | hypothetical protein                                    |
| -                                               | 2,363,461..2,363,552 | 92                   | -      | IRR |                                                         |
| <b>MIC E</b><br><b>4,010bp</b><br>[TA]          | -                    | 2,383,272..2,383,323 | 91     | +   | IRL                                                     |
|                                                 | PXO_00546            | 2,384,284..2,387,193 | 2,880  | +   | TAL effector – talC6a                                   |
|                                                 | -                    | 2,387,191..2,387,282 | 92     | -   | IRR                                                     |
| <b>MIC F</b><br><b>4,938bp</b><br><i>No DR</i>  | -                    | 2,387,192..2,387,220 | 29     | +   | IRL                                                     |
|                                                 | PXO_00545            | 2,387,462..2,387,656 | 192    | +   | hypothetical protein                                    |
|                                                 | PXO_00544            | 2,387,749..2,387,874 | 123    | -   | hypothetical protein                                    |
|                                                 | -                    | 2,387,936..2,388,026 | 91     | +   | IRR                                                     |
|                                                 | PXO_05608            | 2,388,813..2,388,953 | 132    | -   | hypothetical protein                                    |
|                                                 | PXO_05609            | 2,388,988..2,392,041 | 3,051  | +   | TAL effector - talC6b (pseudogene)                      |
| -                                               | 2,392,039..2,392,130 | 92                   | -      | IRR |                                                         |
| <b>MIC G</b><br><b>3,854bp</b><br>[TACTC]       | -                    | 2,682,578..2,682,668 | 91     | +   | IRL                                                     |
|                                                 | PXO_05633            | 2,683,629..2,686,343 | 2,712  | +   | TAL effector - talC7A                                   |
|                                                 | -                    | 2,686,341..2,686,432 | 92     | -   | IRR                                                     |

Comment: MIC B is 99% identical (nucleotide level) to MIC J and MIC G from Xo MAFF and Xo KACC respectively.

14) *Xanthomonas oryzae* pv. *oryzae* str. PXO99A – NC\_010717 (Continuation)

| MIC ID                                     | Locus Tag | Coordinates          | Length | Ori | Predicted Product or Feature |
|--------------------------------------------|-----------|----------------------|--------|-----|------------------------------|
| <b>MIC H</b><br><b>3,854bp</b><br>[TACTC]  | -         | 2,894,665..2,894,755 | 91     | +   | IRL                          |
|                                            | PXO_06229 | 2,895,716..2,898,430 | 2,712  | +   | TAL effector - talC8a        |
|                                            | -         | 2,898,428..2,898,519 | 92     | -   | IRR                          |
| <b>MIC I</b><br><b>5,531bp</b><br>[TACTC]* | -         | 4,104,802..4,104,830 | 29     | +   | IRL                          |
|                                            | PXO_02171 | 4,105,147..4,105,266 | 117    | +   | hypothetical protein         |
|                                            | PXO_02263 | 4,105,270..4,105,569 | 297    | +   | hypothetical protein         |
|                                            | PXO_02170 | 4,105,359..4,105,484 | 123    | -   | hypothetical protein         |
|                                            | -         | 4,105,546..4,105,636 | 91     | +   | IRL                          |
|                                            | PXO_05714 | 4,105,793..4,110,244 | 4,449  | +   | TAL effector - talC9b        |
| <b>MIC J</b><br><b>4,490bp</b><br>[TACTC]* | -         | 4,110,242..4,110,333 | 92     | -   | IRR                          |
|                                            | -         | 4,110,243..4,110,271 | 29     | +   | IRL                          |
|                                            | PXO_05715 | 4,110,513..4,110,707 | 192    | +   | hypothetical protein         |
|                                            | PXO_05716 | 4,110,800..4,110,925 | 123    | -   | hypothetical protein         |
|                                            | -         | 4,110,987..4,111,077 | 91     | +   | IRL                          |
|                                            | PXO_05717 | 4,111,863..4,112,003 | 138    | -   | hypothetical protein         |
|                                            | PXO_05718 | 4,112,038..4,114,644 | 2,604  | +   | TAL effector - avrXa27       |
| <b>MIC K</b><br><b>4,088bp</b><br>[TACTC]* | -         | 4,114,642..4,114,733 | 92     | -   | IRR                          |
|                                            | -         | 4,114,643..4,114,671 | 29     | +   | IRL                          |
|                                            | PXO_05719 | 4,114,913..4,115,107 | 192    | +   | hypothetical protein         |
|                                            | PXO_05720 | 4,115,200..4,115,325 | 123    | -   | hypothetical protein         |
|                                            | -         | 4,115,387..4,115,477 | 91     | +   | IRL                          |
|                                            | PXO_05721 | 4,116,263..4,116,403 | 138    | -   | hypothetical protein         |
| <b>MIC L</b><br><b>2,202bp</b><br>[TACTC]* | PXO_02269 | 4,116,438..4,118,642 | 2,202  | +   | TAL effector - talC9d        |
|                                            | -         | 4,118,640..4,118,731 | 92     | -   | IRR                          |

(\*) The DRs are located flanking the second IRL and the IRR (includes only the TALE gene).

15) *Xanthomonas oryzae* pv. *oryzae* str. MAFF311018 – NC\_007705

| MIC ID                                   | Locus Tag            | Coordinates          | Length | Ori                  | Predicted Product or Feature                                    |
|------------------------------------------|----------------------|----------------------|--------|----------------------|-----------------------------------------------------------------|
| <b>MIC A</b><br>3,746bp<br>[C/GAGTA]     | -                    | 1,232,692..1,232,783 | 92     | +                    | IRL                                                             |
|                                          | XOO_1134             | 1,232,781..1,236,191 | 3,408  | -                    | TAL effector - AvrBs3/Pth                                       |
|                                          | -                    | 1,236,348..1,236,438 | 91     | -                    | IRR                                                             |
| <b>MIC B</b><br>4,784bp<br>[G/CAGTA]     | -                    | 1,237,092..1,237,183 | 92     | +                    | IRL                                                             |
|                                          | XOO_1136             | 1,237,181..1,241,629 | 4,446  | -                    | TAL effector - AvrBs3/Pth                                       |
|                                          | -                    | 1,241,786..1,241,876 | 91     | -                    | IRR                                                             |
| <b>MIC C</b><br>4,058bp<br>[AGTAC]       | -                    | 2,205,565..2,205,656 | 92     | +                    | IRL                                                             |
|                                          | XOO_1998             | 2,205,654..2,209,376 | 4,260  | -                    | TAL effector - AvrBs3/Pth                                       |
|                                          | -                    | 2,209,533..2,209,623 | 91     | -                    | IRR                                                             |
| <b>MIC D</b><br>7,575bp<br><i>No DR</i>  | -                    | 2,210,920..2,210,989 | 72     | +                    | IRL                                                             |
|                                          | XOO_2000             | 2,211,006..2,212,328 | 1,320  | -                    | IS <i>Xoo5</i> aa1 transposase (IS5 ssg IS5) [Complete IS]      |
|                                          | -                    | 2,212,619..2,212,645 | 27     | -                    | IRR                                                             |
|                                          | XOO_2001             | 2,212,644..2,216,771 | 4,125  | -                    | TAL effector - AvrBs3/Pth                                       |
|                                          | XOO_2002             | 2,217,060..2,218,379 | 1,317  | -                    | IS <i>Xo15</i> aa1 transposase (IS701)) [Complete IS]           |
| -                                        | 2,218,433..2,218,495 | 60                   | -      | IRR                  |                                                                 |
| <b>MIC E</b><br>4,191bp<br><i>No DR</i>  | -                    | 2,352,097..2,352,188 | 92     | +                    | IRL                                                             |
|                                          | XOO_2127             | 2,352,186..2,356,040 | 3,845  | -                    | TAL effector - AvrBs3/Pth                                       |
|                                          | -                    | 2,356,197..2,356,288 | 92     | -                    | IRR                                                             |
| <b>MIC F</b><br>3,635bp<br>[TAG]         | -                    | 2,356,941..2,357,032 | 92     | +                    | IRL                                                             |
|                                          | XOO_2129             | 2,357,030..2,360,329 | 3,297  | -                    | TAL effector - AvrBs3/Pth                                       |
|                                          | -                    | 2,360,486..2,360,576 | 91     | -                    | IRR                                                             |
| <b>MIC G</b><br>4,055bp<br>[TACTG]       | -                    | 3,219,386..3,219,476 | 91     | +                    | IRL                                                             |
|                                          | XOO_2865             | 3,219,633..3,223,352 | 3,717  | +                    | TAL effector - AvrBs3/Pth                                       |
|                                          | -                    | 3,223,350..3,223,441 | 92     | -                    | IRR                                                             |
| <b>MIC H</b><br>4,787bp<br><i>No DR</i>  | -                    | 3,224,095..3,224,185 | 91     | +                    | IRL                                                             |
|                                          | XOO_2866             | 3,224,342..3,228,793 | 4,449  | +                    | TAL effector - AvrBs3/Pth                                       |
|                                          | -                    | 3,228,791..3,228,882 | 92     | -                    | IRR                                                             |
| <b>MIC I</b><br>4,676bp<br><i>No DR</i>  | -                    | 3,229,536..3,229,626 | 91     | +                    | IRL                                                             |
|                                          | XOO_2868             | 3,229,783..3,234,123 | 4,338  | +                    | TAL effector - AvrBs3/Pth                                       |
|                                          | -                    | 3,234,121..3,234,212 | 92     | -                    | IRR                                                             |
| <b>MIC J</b><br>18,244bp<br><i>No DR</i> | -                    | 3,234,122..3,234,150 | 29     | +                    | IRL                                                             |
|                                          | XOO_2869             | 3,233,116..3,234,604 | 511    | -                    | Acridiflavin resistance protein – disrupted (IPR001036)         |
|                                          | XOO_2870             | 3,234,413..3,236,413 | 1,476  | -                    | IS <i>Xoo5</i> aa1 transposase (IS5 ssg IS5) [Complete IS]      |
|                                          | XOO_2871             | 3,237,332..3,236,744 | 2,587  | -                    | Acridiflavin resistance protein – disrupted (IPR001036)         |
|                                          | XOO_2872             | 3,238,501..3,239,389 | 1,111  | -                    | Membrane fusion protein (IPR006143)                             |
|                                          | XOO_2873             | 3,238,626..3,241,204 | 579    | +                    | DNA binding – Homeodoamin-like (IPR009057)                      |
|                                          | XOO_2874             | 3,241,065..3,242,189 | 1,122  | -                    | Two component system (psedogene) (IPR011123)                    |
|                                          | XOO_2875             | 3,242,691..3,244,778 | 2,088  | +                    | Type III effector - XopX                                        |
|                                          | XOO_2876             | 3,243,194..3,246,186 | 993    | +                    | IS <i>Xoo14</i> aa1 transposase (IS5) [Complete IS]             |
|                                          | -                    | 3,244,797..3,244,886 | 91     | -                    | IRL                                                             |
|                                          | XOO_2877             | 3,244,677..3,249,757 | 3,081  | +                    | Type III effector - XopU                                        |
|                                          | XOO_2878             | 3,248,208..3,250,444 | 237    | +                    | transposase (IS3 ssg IS407) [Complete IS]                       |
|                                          | XOO_2879             | 3,248,525..3,250,965 | 441    | +                    | transposase (IS3 ssg IS407) [Complete IS]                       |
|                                          | XOO_2880             | 3,249,713..3,250,928 | 784    | -                    | transposase (IS256) [Complete IS]                               |
| XOO_2881                                 | 3,250,165..3,251,722 | 442                  | -      | Hypothetical protein |                                                                 |
| -                                        | 3,252,334..3,252,366 | 33                   | +      | IRR                  |                                                                 |
| <b>MIC K</b><br>2,232bp<br><i>No DR</i>  | -                    | 4,763,458..4,763,547 | 91     | +                    | IRL                                                             |
|                                          | XOO_4215             | 4,763,699..4,764,424 | 723    | +                    | Polymerase/histidinol phosphatase-like (IPR016195)              |
|                                          | XOO_4216             | 4,764,376..4,765,467 | 1,089  | +                    | P-loop containing nucleoside triphosphate hydrolase (IPR027417) |
|                                          | -                    | 4,765,600..4,765,690 | 92     | -                    | IRR                                                             |

Comment: MIC J is 99% identical (nucleotide level) to MIC B and MIC G from Xo PXO99A and Xo KACC10331 respectively.

16) *Xanthomonas oryzae* pv. *oryzae* str. KACC 10331 – NC\_006834

| MIC ID                                    | Locus Tag            | Coordinates          | Length | Ori                  | Predicted Product or Feature                          |
|-------------------------------------------|----------------------|----------------------|--------|----------------------|-------------------------------------------------------|
| <b>MIC A</b><br><b>4,058bp</b><br>[AGTA]  | -                    | 2,226,583..2,226,674 | 92     | +                    | IRL                                                   |
|                                           | XOO2128              | 2,226,672..2,230,478 | 3,804  | -                    | TAL effector - AvrBs3/Pth                             |
|                                           | -                    | 2,230,551..2,230,641 | 91     | -                    | IRR                                                   |
| <b>MIC B</b><br><b>7,583bp</b><br>No DR   | -                    | 2,231,938..2,232,007 | 72     | +                    | IRL                                                   |
|                                           | XOO2130              | 2,232,024..2,233,529 | 1,503  | -                    | ISXoo5 aa1 transposase (IS5 ssgR IS5) [Complete IS]   |
|                                           | XOO2131              | 2,233,670..2,237,881 | 4,209  | -                    | TAL effector - AvrBs3/Pth                             |
|                                           | XOO2132              | 2,238,086..2,239,468 | 1,380  | -                    | ISXo15 aa1 transposase (IS701) [Complete IS]          |
|                                           | -                    | 2,239,482..2,239,521 | 40     | -                    | IRR                                                   |
| <b>MIC C</b><br><b>3,767bp</b><br>No DR   | -                    | 2,377,246..2,377,337 | 92     | +                    | IRL                                                   |
|                                           | XOO2264              | 2,377,335..2,380,850 | 3,513  | -                    | TAL effector - AvrBs3/Pth                             |
|                                           | -                    | 2,380,923..2,381,013 | 91     | -                    | IRR                                                   |
| <b>MIC D</b><br><b>4,907bp</b><br>[TACTC] | -                    | 2,401,741..2,401,831 | 91     | +                    | IRL                                                   |
|                                           | XOO2276              | 2,401,778..2,405,743 | 3,963  | +                    | TAL effector - AvrBs3/Pth                             |
|                                           | XOO2277              | 2,405,806..2,406,252 | 444    | +                    | Transposase (IS5) [Partial IS]                        |
|                                           | -                    | 2,406,604..2,406,648 | 45     | -                    | IRR                                                   |
| <b>MIC E</b><br><b>5,498bp</b><br>[TACTC] | -                    | 3,224,429..3,224,519 | 91     | +                    | IRL                                                   |
|                                           | XOO3014              | 3,224,466..3,229,838 | 5,370  | +                    | TAL effector - AvrBs3/Pth                             |
|                                           | -                    | 3,229,836..3,229,927 | 92     | -                    | IRR                                                   |
| <b>MIC F</b><br><b>3,965bp</b><br>No DR   | -                    | 3,230,581..3,230,671 | 91     | +                    | IRL                                                   |
|                                           | XOO3015              | 3,230,618..3,234,457 | 3,837  | +                    | TAL effector - AvrBs3/Pth                             |
|                                           | -                    | 3,234,455..3,234,546 | 92     | -                    | IRR                                                   |
| <b>MIC G</b><br><b>18,266bp</b><br>No DR  | -                    | 3,234,456..3,234,484 | 29     | +                    | IRL                                                   |
|                                           | XOO3016              | 3,235,450..3,234,938 | 511    | -                    | Acriflavin resistance protein – disrupted (IPR001036) |
|                                           | XOO3017              | 3,237,011..3,235,521 | 1,489  | -                    | ISXoo5 aa1 transposase (IS5 ssgR IS5) [Complete IS]   |
|                                           | XOO3018              | 3,239,682..3,237,094 | 2,587  | -                    | Acriflavin resistance protein – disrupted (IPR001036) |
|                                           | XOO3019              | 3,240,851..3,239,739 | 1,111  | -                    | Membrane fusion protein (IPR006143)                   |
|                                           | XOO3020              | 3,240,976..3,241,554 | 579    | +                    | DNA binding – Homeodoamin-like (IPR009057)            |
|                                           | XOO3021              | 3,242,189..3,242,752 | 947    | -                    | Two component system (IPR011123)                      |
|                                           | XOO3022              | 3,243,040..3,245,127 | 2,088  | +                    | Type III effector - XopX                              |
|                                           | -                    | 3,245,146..3,245,187 | 42     | +                    | IRL                                                   |
|                                           | XOO3023              | 3,245,513..3,246,178 | 666    | +                    | ISXoo14transposase (IS5) [Disrupted IS]               |
|                                           | XOO3024              | 3,246,142..3,246,615 | 474    | +                    | ISXoo14 transposase (IS5) [Disrupted IS]              |
|                                           | XOO3025              | 3,247,032..3,248,423 | 1,392  | +                    | Type III effector – XopU (pseudogene)                 |
|                                           | XOO3025              | 3,248,395..3,250,113 | 1,719  | +                    | Type III effector – XopU (pseudogene)                 |
|                                           | XOO3026              | 3,250,564..3,250,800 | 237    | +                    | transposase (IS3 ssgR IS407) [Complete IS]            |
|                                           | XOO3027              | 3,250,794..3,251,321 | 528    | +                    | transposase (IS3 ssgR IS407) [Complete IS]            |
|                                           | XOO3028              | 3,252,069..3,251,284 | 784    | -                    | transposase (IS256) [Complete IS]                     |
| XOO3029                                   | 3,252,521..3,252,078 | 442                  | -      | Hypothetical protein |                                                       |
| -                                         | 3,252,690..3,252,722 | 33                   | -      | IRR                  |                                                       |
| <b>MIC H</b><br><b>3,116bp</b><br>[AATCA] | -                    | 4,767,482..4,767,569 | 91     | +                    | IRL                                                   |
|                                           | XOO4472              | 4,767,721..4,770,375 | 2,652  | +                    | Polymerase/histidinol phosphatase-like (IPR016195)    |
|                                           | -                    | 4,770,508..4,770,598 | 92     | -                    | IRR                                                   |

Comment: MIC G is 99% identical (nucleotide level) to MIC B and MIC G from Xo PXO99A and Xo KACC respectively.

17) *Xanthomonas oryzae* pv. *oryzicola* str. BLS256 – NC\_017267



| MIC ID                                         | Locus Tag | Coordinates          | Length | Ori | Predicted Product or Feature                       |
|------------------------------------------------|-----------|----------------------|--------|-----|----------------------------------------------------|
| <b>MIC A</b><br><b>7,407bp</b><br><i>No DR</i> | -         | 2,548,617..2,548,706 | 91     | +   | IRL                                                |
|                                                | XOC_2512  | 2,549,003..2,550,064 | 1,059  | +   | ISXoo14 (IS5) [complete IS]                        |
|                                                | XOC_2513  | 2,550,471..2,553,551 | 3,078  | +   | type III effector - XopU                           |
|                                                | XOC_2516  | 2,553,877..2,554,584 | 705    | +   | transposase (IS1404) [partial IS]                  |
|                                                | XOC_2515  | 2,554,547..2,554,705 | 156    | -   | disrupted transposase (IS256) – Partial N terminus |
|                                                | XOC_2517  | 2,554,705..2,555,220 | 513    | -   | disrupted transposase (IS256) – Partial C terminus |
|                                                | XOC_2518  | 2,555,622..2,555,981 | 357    | +   | partial transposase (Tn3)                          |
|                                                | -         | 2,555,991..2,556,024 | 34     | -   | IRR                                                |
