# Supplementary material for: A TALE of Transposition: Tn3-Like Transposons Play a Major Role in the Spread of Pathogenicity Determinants of Xanthomonas citri and Other Xanthomonads
Source: PubMed Central journal article supplement — mBio. 2015 Feb 17;6(1):e02505-14. doi: 10.1128/mBio.02505-14 (PMC4337579; doi:10.1128/mbio.02505-14), 2015-02-17
Supplement: mbo001152165st4.pdf [file mbo001152165st4.pdf]

**Table S4. Organization of TnXaxI related elements**

| Main chromosome or Plasmid            | Mlt                                                                                         | TnpA                                                                                                                                                                                                                 | TnpS                                                                                                                                          | res site [TnpS to TnpT]                                       | TnpT                                                                                                      |
|---------------------------------------|---------------------------------------------------------------------------------------------|----------------------------------------------------------------------------------------------------------------------------------------------------------------------------------------------------------------------|-----------------------------------------------------------------------------------------------------------------------------------------------|---------------------------------------------------------------|-----------------------------------------------------------------------------------------------------------|
| Xoo KACC 10331                        | <i>Not found</i>                                                                            | <i>Not found</i>                                                                                                                                                                                                     | <i>Not found</i>                                                                                                                              | <i>Not found</i>                                              | <i>Not found</i>                                                                                          |
| Xoo MAFF 311018                       | <i>Not found</i>                                                                            | <i>Not found</i>                                                                                                                                                                                                     | <i>Not found</i>                                                                                                                              | <i>Not found</i>                                              | <i>Not found</i>                                                                                          |
| Xoo PXO99A                            | <i>Not found</i>                                                                            | <b>A)</b> 2,302,697 .. 2,305,654 (59%)<br>[IS630 partial] – [TnpS]<br><b>B)</b> 1,625,991 .. 1,626,503 (92%) – Partial<br>[VirG] – [IS256 partial]                                                                   | <b>A)</b> 2,301,719 .. 2,302,666 (80%)<br>[arsenical membrane pump] – [TnpA]                                                                  | <b>A)</b> 2,294,680 .. 2,294,784 (79%)<br>[ISXoo5] – [TnpT]   | <b>A)</b> 2,293,677..2,294,663 (82%)<br>[ISXoo5] – [TnpT]                                                 |
| Xoo BLS256                            | <b>A)</b> 4,233,640.. 4,234,908 (95%)<br>[C.H] – [IS3 ssgr IS407 partial]                   | <i>Not found</i>                                                                                                                                                                                                     | <i>Not found</i>                                                                                                                              | <i>Not found</i>                                              | <i>Not found</i>                                                                                          |
| Xff 4834-R plc                        | <b>A)</b> 29,119 .. 30,390 (98%)<br>[XopE3] - [C.H]                                         | <i>Not found</i>                                                                                                                                                                                                     | <i>Not found</i>                                                                                                                              | <i>Not found</i>                                              | <b>A)</b> 4,947,724 .. 4,948,167 (84%) - Partial                                                          |
| <i>X. albilineans</i> str. GPE PC73   | <b>A)</b> 2,246,792 .. 2,248,069 (87%)<br>[lysineaminomutase] – [trna/rnamethyltransferase] | <i>Not found</i>                                                                                                                                                                                                     | <i>Not found</i>                                                                                                                              | <i>Not found</i>                                              | <i>Not found</i>                                                                                          |
| Xcv pXCV183                           | <i>Not found</i>                                                                            | <b>A)</b> 105,147 .. 108,086 (59%)<br>[tnpS] – [repA]<br><b>B)</b> 119,656 .. 122,448 (41%)<br>[C.H] – [C.H]<br><b>C)</b> 124,208 .. 127,144 (59%)<br>[TnpS] – [hypothetical]                                        | <b>A)</b> 104,170 .. 105,120 (97%)<br>[tnpT] – [tnpA]<br><b>B)</b> 123,255 .. 124,181 (98%)<br>[C.H] – [TnpA]                                 | <b>A)</b> 103,979 .. 104,170 (90%)<br>[TnpT] – [ TnpS]        | <b>A)</b> 102,969 .. 103,979 (91%)<br>[Type III] – [TnpS]<br><b>B)</b> 101,026 .. 101532 (94%)<br>Partial |
| Xcc Aw12879 pXcaw58                   | <i>Not found</i>                                                                            | <b>A)</b> 6,161 .. 9,097 (59%)<br>[TnpS] – [Tn3 transposase - partial]<br><b>B)</b> 18,384 .. 21,176 (41%)<br>[hypothetical] – [hypothetical]<br><b>C)</b> 54,640 .. 57,432 (41%)<br>[hypothetical] – [hypothetical] | <b>A)</b> 3,983 .. 6,134 (95%) - frameshift<br>[ Type III] – [TnpA]                                                                           | <b>A)</b> 3,792 .. 3,983 (85%)<br>[TnpT] - [TnpS]             | <b>A)</b> 3,218 .. 3,790 (94%)<br>[hypothetical] – [TnpS]<br><b>B)</b> 2,739 .. 3,218 (95%)<br>Partial    |
| Xcc B100                              | <i>Not found</i>                                                                            | <b>A)</b> 2,759,319 .. 2,762,255 (59%)<br>[Peptidase] – [TnpS]<br><b>B)</b> 2,787,410 .. 2,788,048 (87%) – Partial<br>[IS3 ssgr IS407 partial ] – [type III]                                                         | <b>A)</b> 2,762,282.. 2,763,226 (90%)<br>[TnpA] – [TnpT]                                                                                      | <b>A)</b> 2,763,259 .. 2,763,416 (79%)<br>[TnpS] – [TnpT]     | <b>A)</b> 2,763,416 .. 2764465 (93%)<br>[TnpS] – [hypothetical ]                                          |
| <i>Pseudoxanthomonaspadi</i> x BD-a59 | <i>Not found</i>                                                                            | <b>A)</b> 636,723 .. 633,745 (85%)<br>[alcohol dehydrogenases] – [TnpS]                                                                                                                                              | <b>A)</b> 636,754 .. 638,019 (71%)<br>[ TnpA] – [transcription factor ]<br><b>B)</b> 651,884 .. 653,152 (71%)<br>[H] – [transcription factor] | <b>A)</b> 666,719 ..666,827 (76%)<br>[ATPase domain] – [TnpT] | <b>A)</b> 666,842 .. 667,873 (86%)<br>[endonuclease] – [sec-C metal-binding protein]                      |

Abbreviations: H= hypothetical protein; C.H= conserved hypothetical protein

The gene products inside the brackets indicate the genome context of each TnXaxI genes
