# Supplementary figures and images for: A TALE of Transposition: Tn3-Like Transposons Play a Major Role in the Spread of Pathogenicity Determinants of Xanthomonas citri and Other Xanthomonads
Source: PubMed Central journal article supplement — mBio. 2015 Feb 17;6(1):e02505-14. doi: 10.1128/mBio.02505-14 (PMC4337579; doi:10.1128/mbio.02505-14), 2015-02-17

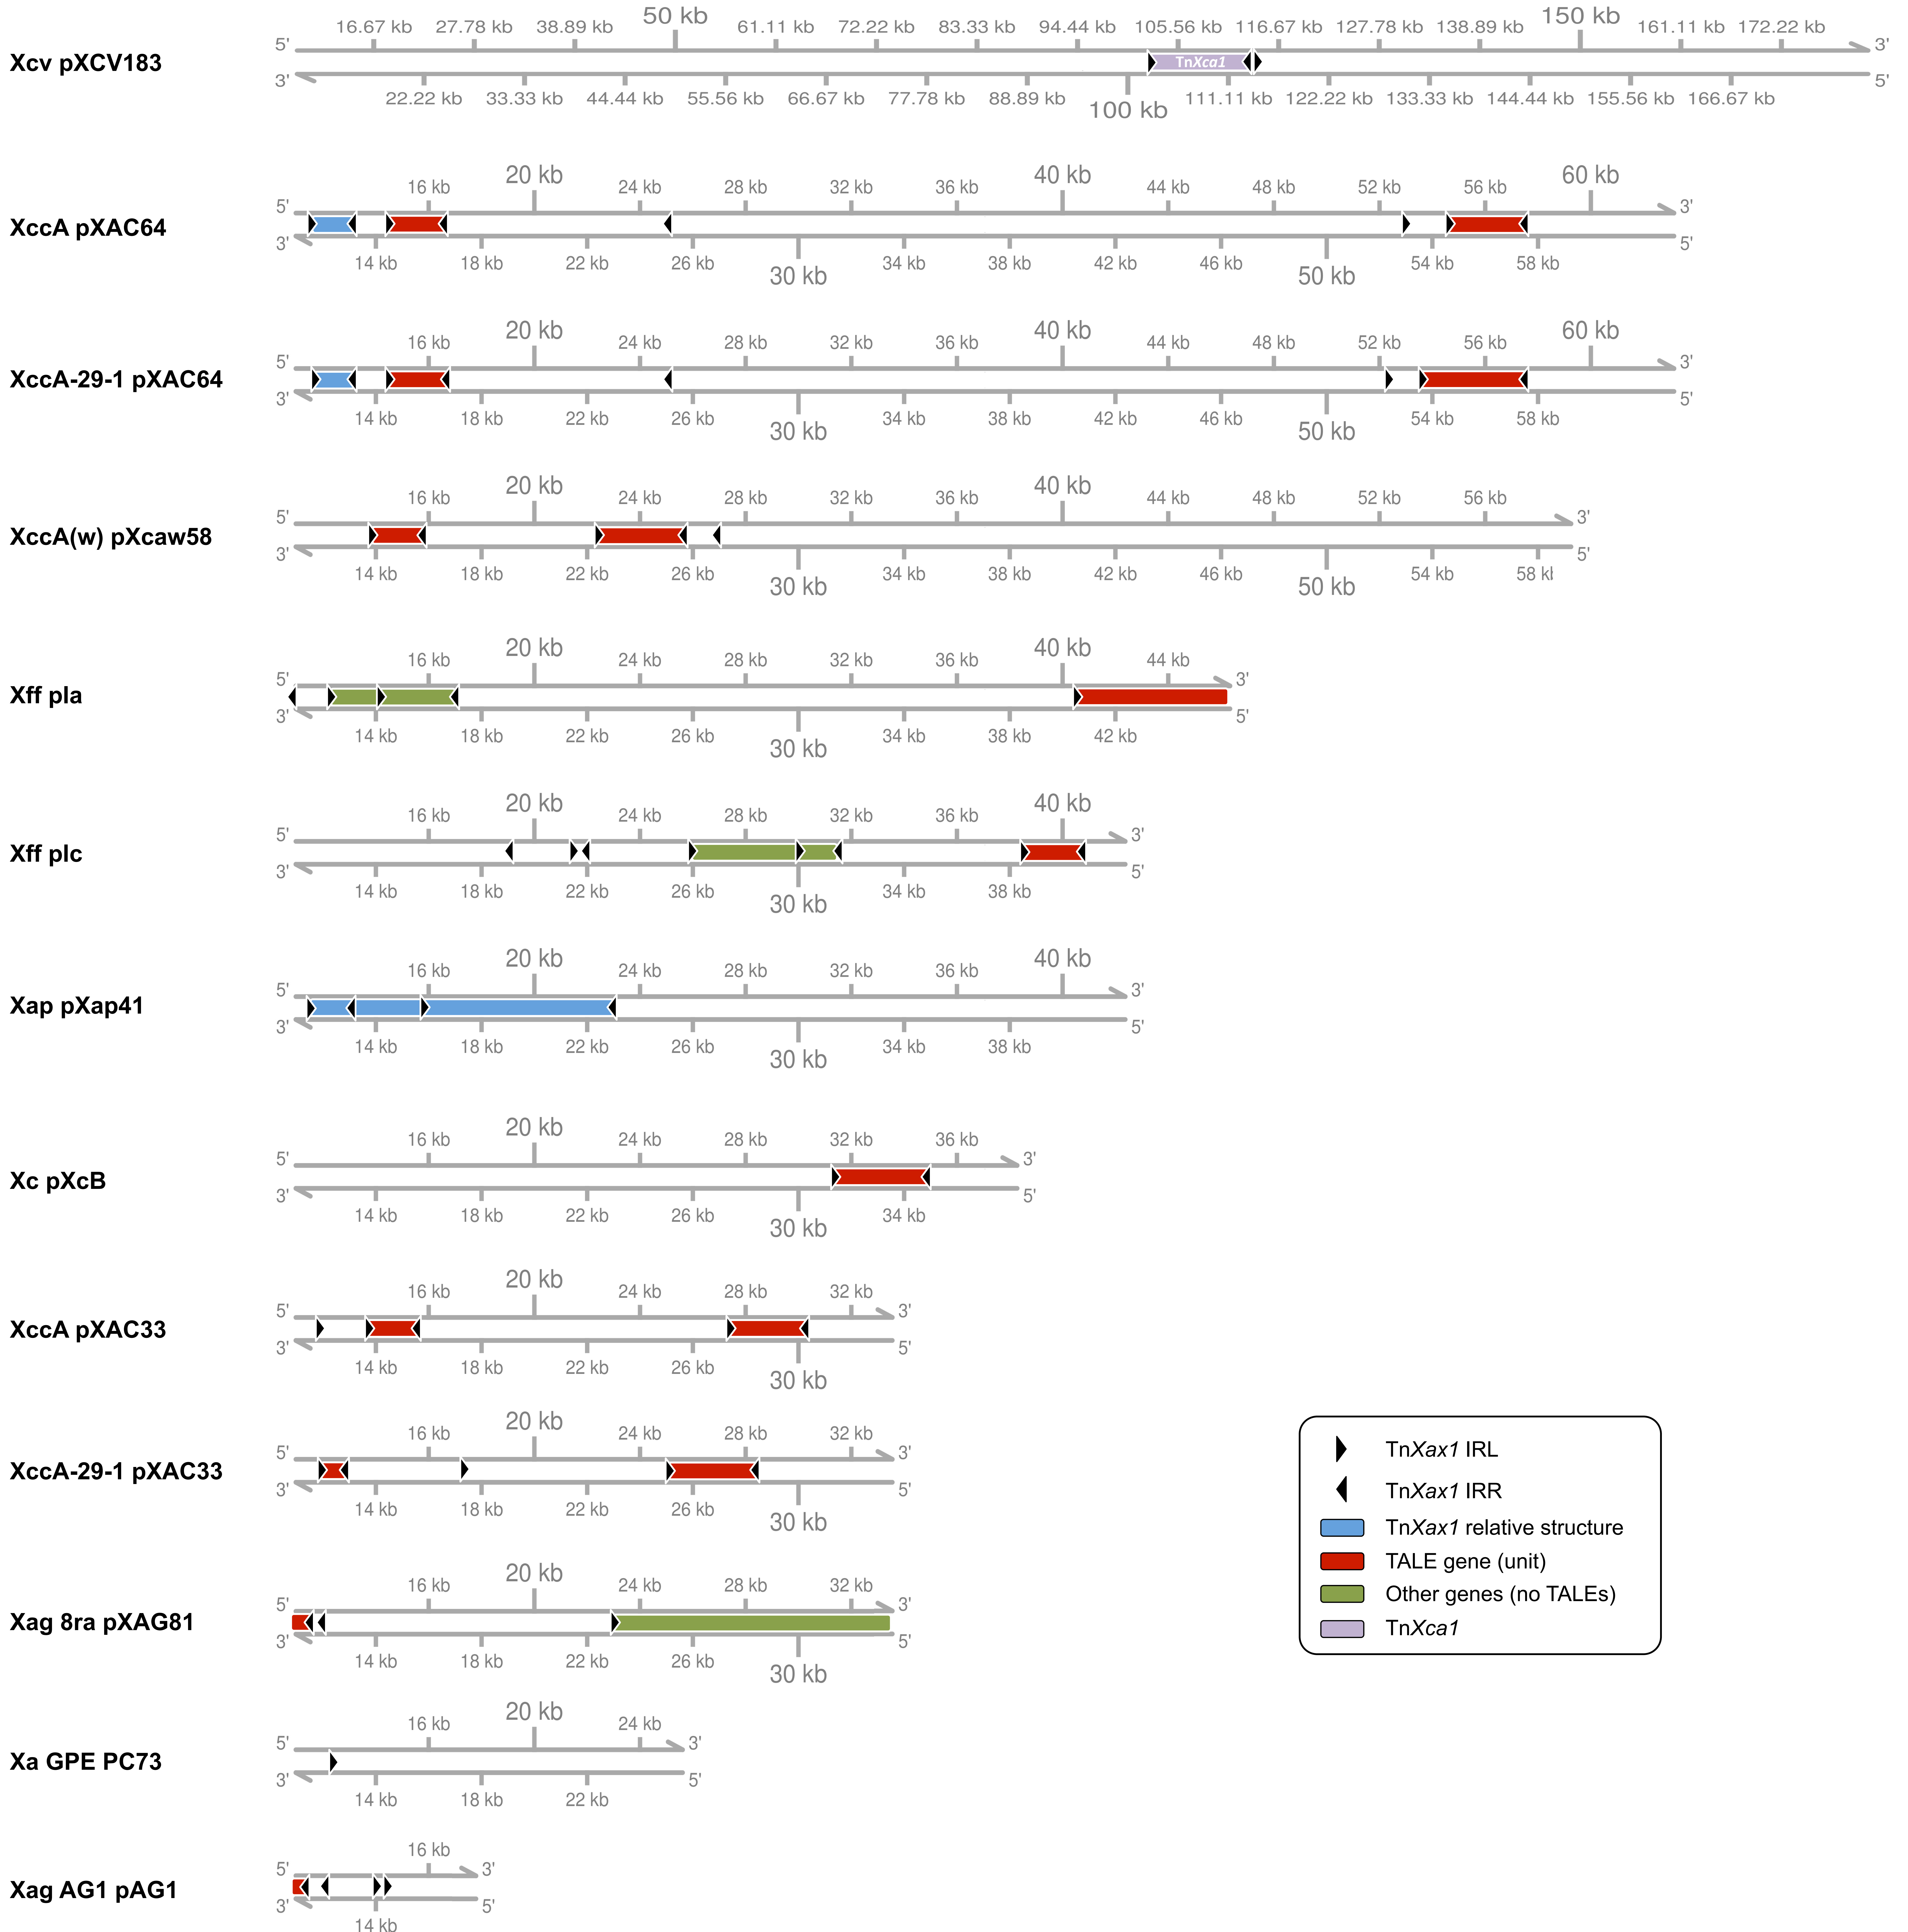

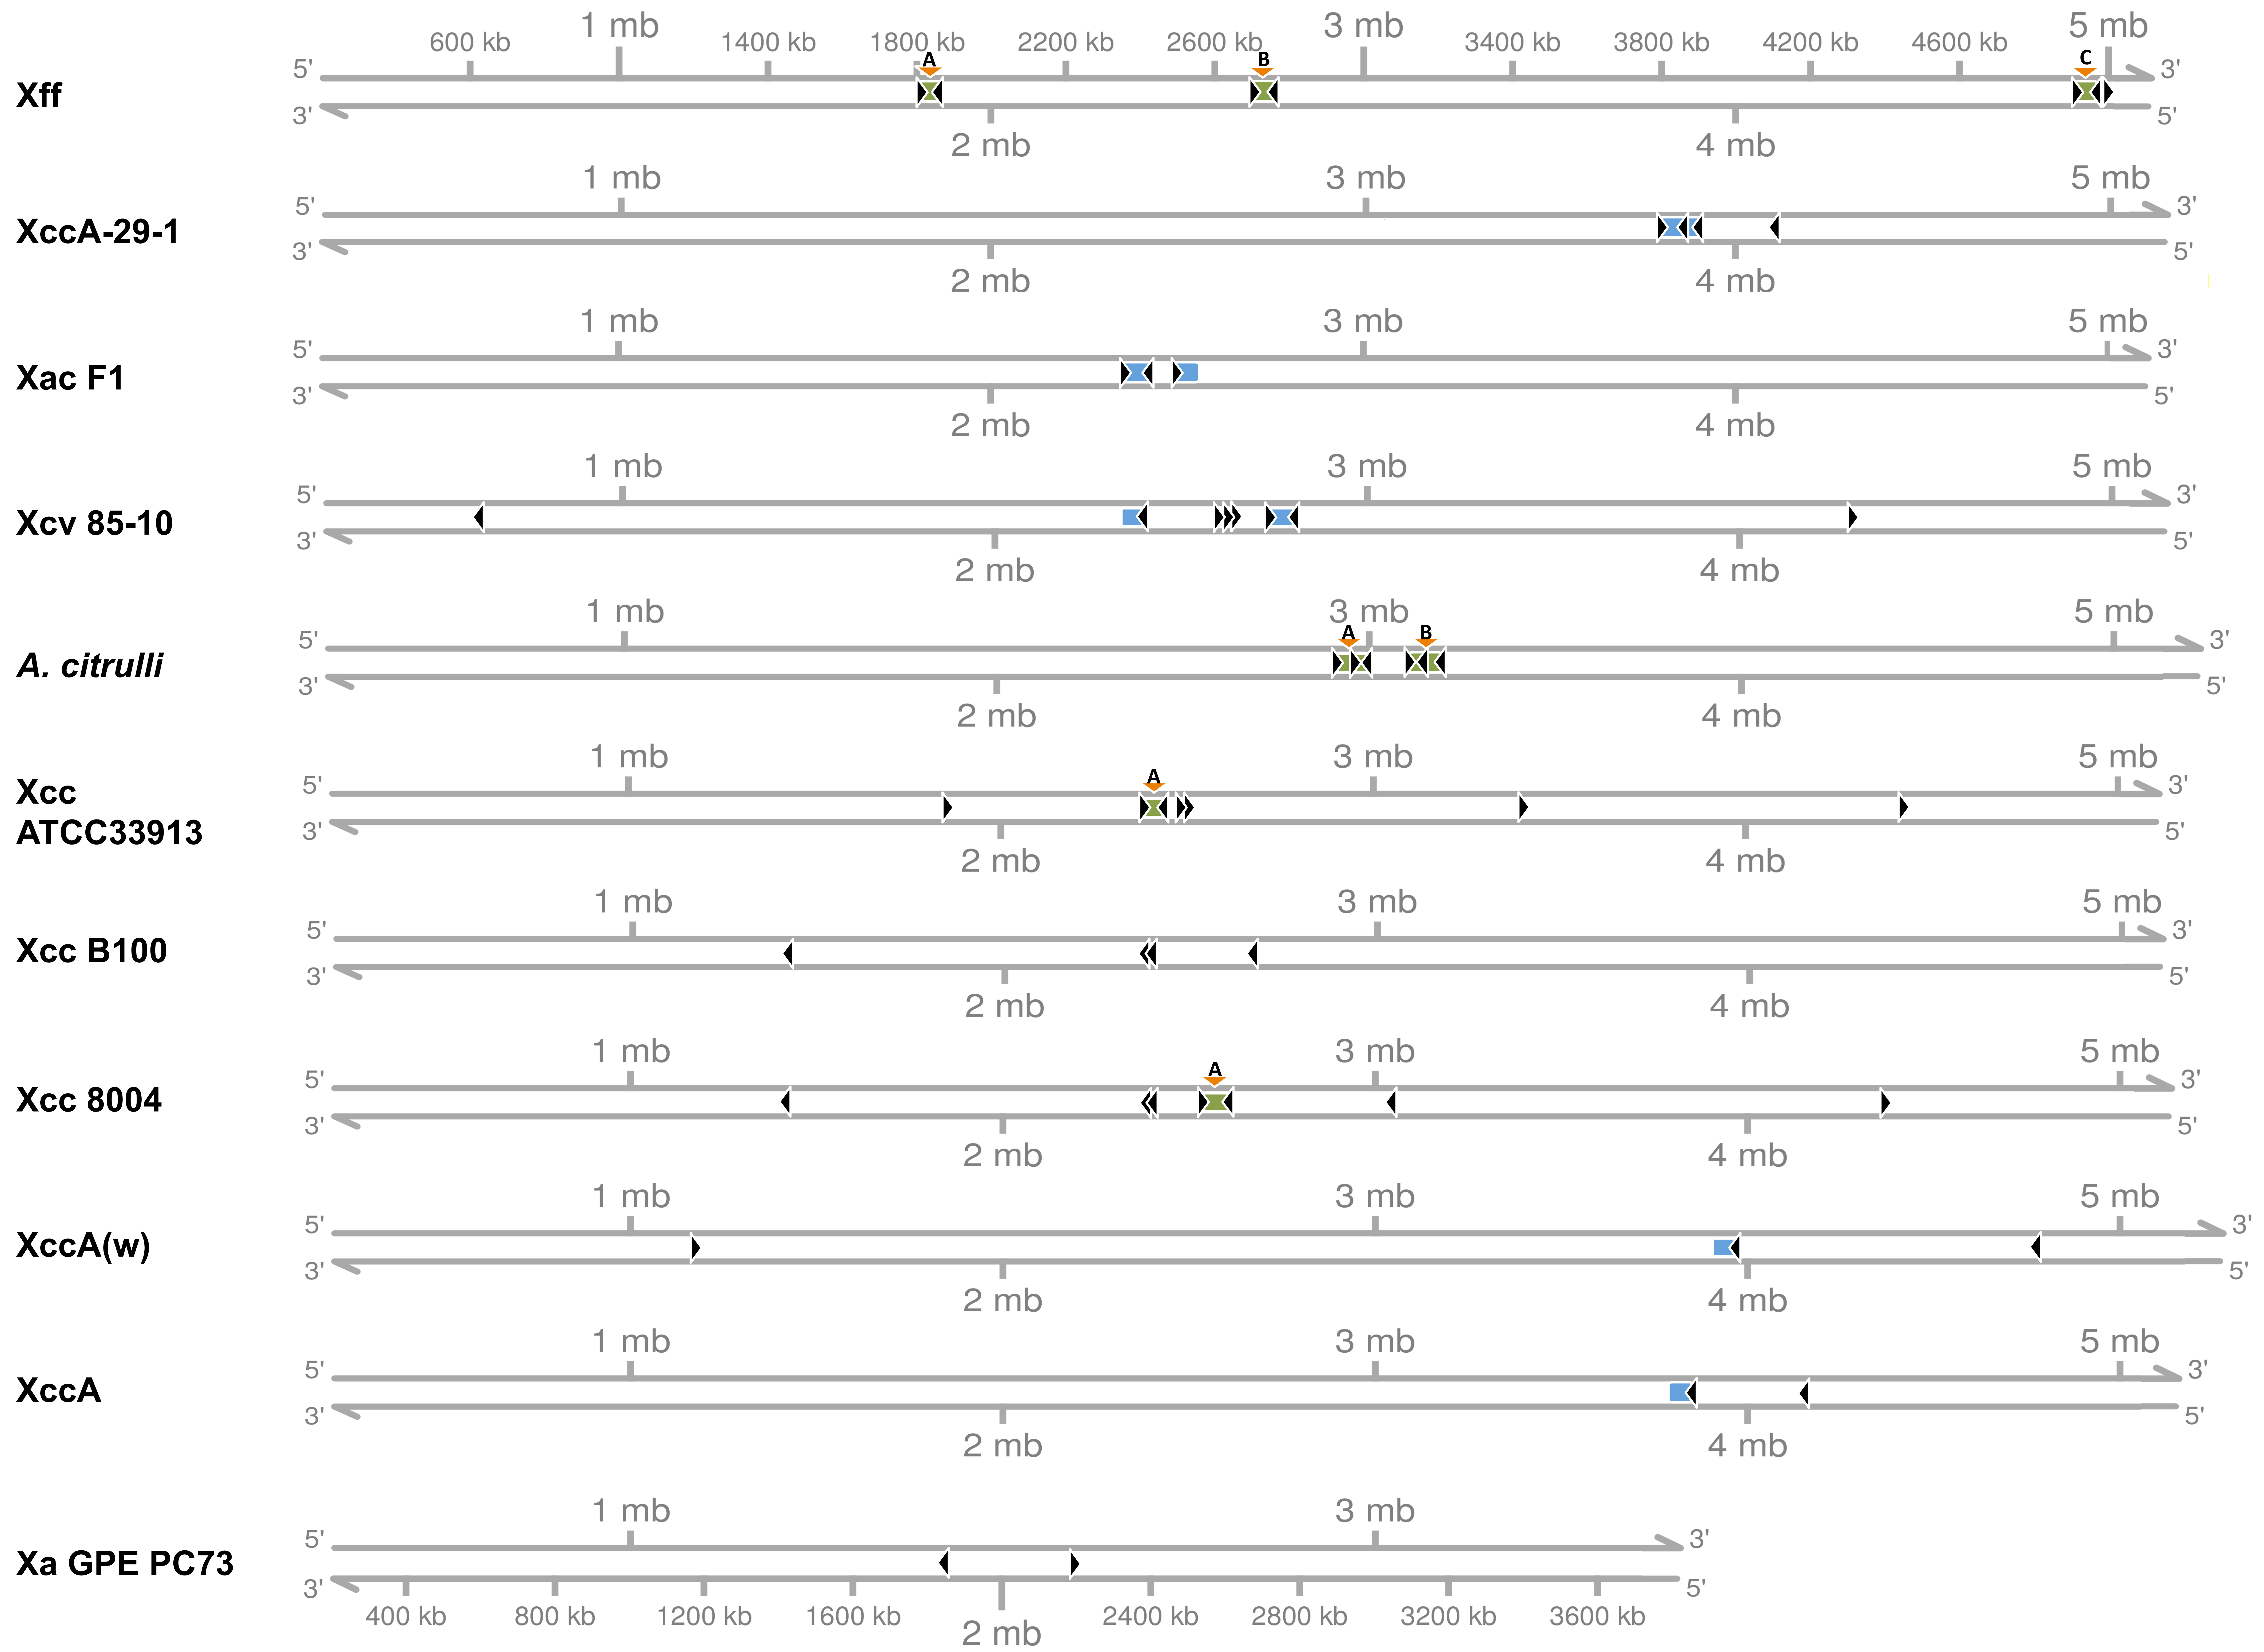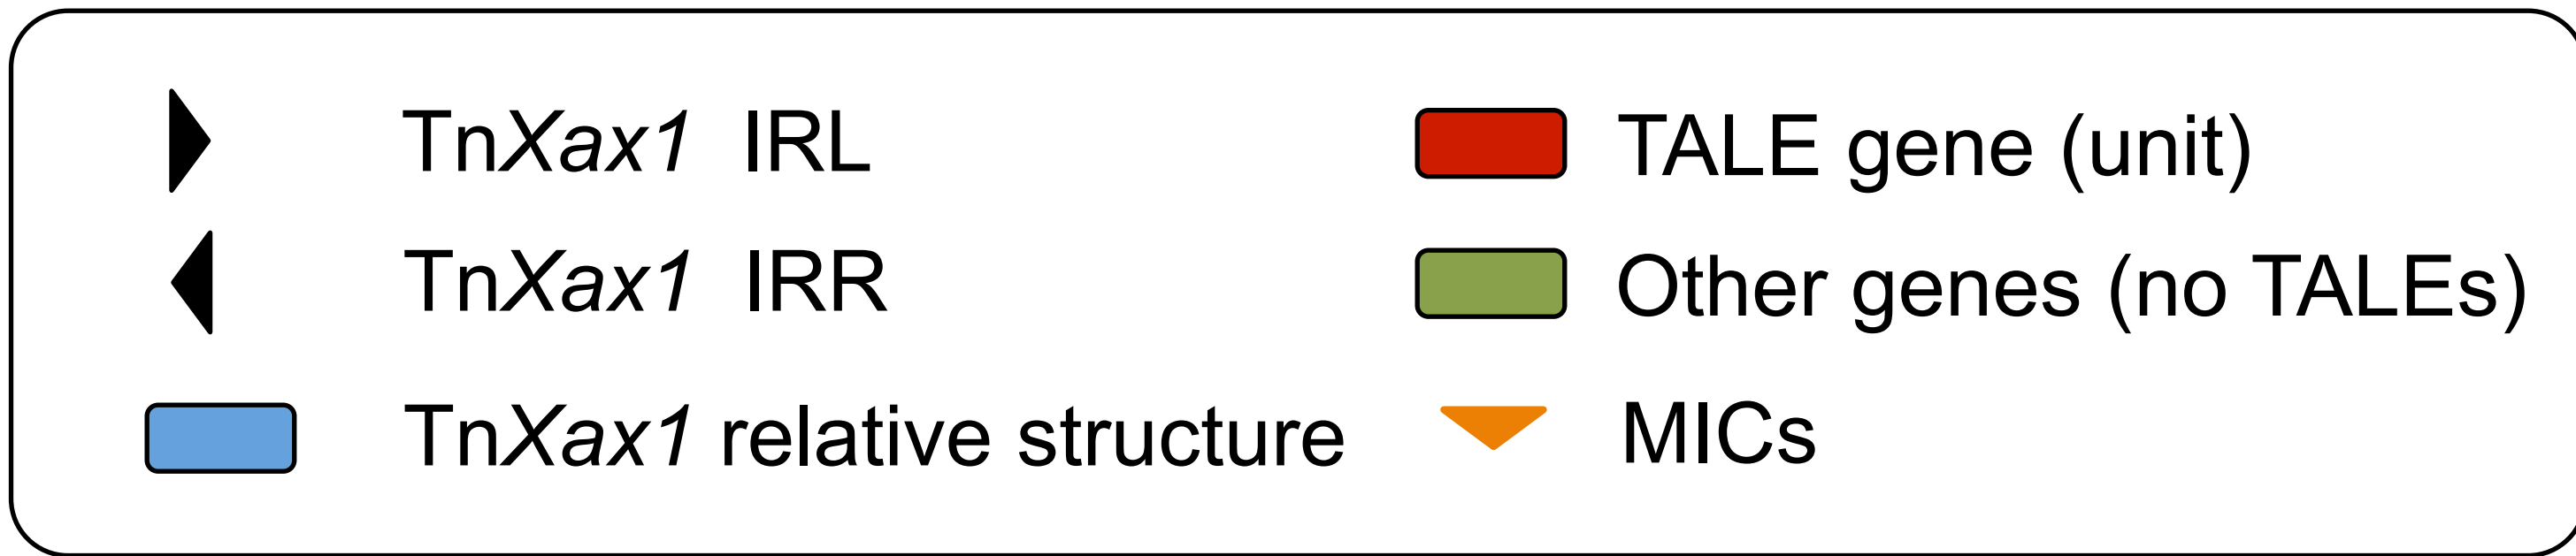

Supplement: mbo001152165sf1.pdf [file mbo001152165sf1.pdf]
